# Supplementary material for: Interactions of Monocytes, HIV, and ART Identified by an Innovative scRNAseq Pipeline: Pathways to Reservoirs and HIV-Associated Comorbidities
Source: PubMed Central journal article supplement (PMC7387797; doi:10.1128/mbio.01037-20), 2020-07-28
Supplement: mBio.01037-20-st001.pdf [file mBio.01037-20-st001.pdf]

**Supplementary Table 1:** List of differentially expressed genes between HIV<sup>+</sup> and HIV<sup>exp</sup> mature monocytes from the integrated dataset of HIV-infected mature monocytes without ART-treatment (HIV<sup>+</sup> vs HIV<sup>exp</sup> mature monocytes from HIV-infected mature monocyte cultures).

| Gene.ID  | Avg. Diff. <sup>1</sup> | Pct.1 <sup>2</sup> | Pct.2 <sup>3</sup> | P.Value.Adj           |
|----------|-------------------------|--------------------|--------------------|-----------------------|
| FTL      | 81.3246896              | 1                  | 1                  | 0.000369336           |
| SPP1     | 39.2708578              | 0.997              | 0.997              | 1.96331565977059E-21  |
| TMSB4X   | 12.8485068              | 1                  | 1                  | 8.816793909191E-24    |
| CTSB     | 8.67478848              | 0.994              | 0.995              | 3.4405057409309E-30   |
| B2M      | 7.44177283              | 1                  | 1                  | 1.6526132342616E-11   |
| MT-CO2   | 7.20416407              | 0.987              | 0.987              | 2.99743751410066E-22  |
| VIM      | 7.10976963              | 1                  | 1                  | 1.71459778438076E-08  |
| APOE     | 5.7509563               | 0.848              | 0.823              | 4.52015140344873E-24  |
| MMP9     | 5.27816015              | 0.936              | 0.951              | 3.99286063884207E-14  |
| CSTB     | 4.8180845               | 1                  | 1                  | 1.26805115910356E-05  |
| MT-CO1   | 4.64831762              | 0.998              | 0.999              | 0.006130412           |
| APOC1    | 4.59031607              | 0.835              | 0.788              | 1.97652482648866E-20  |
| HIV-B    | 4.05017544              | 0.584              | 0                  | 1.09116955338285E-275 |
| CHI3L1   | 4.04457286              | 0.435              | 0.359              | 1.19060876979202E-21  |
| HLA-B    | 4.02082395              | 1                  | 0.999              | 1.8518182802388E-08   |
| FABP5    | 3.99094233              | 0.727              | 0.695              | 1.17363259762542E-10  |
| LGALS1   | 3.92034036              | 0.999              | 0.999              | 8.86451226845659E-35  |
| S100A11  | 3.70162286              | 0.999              | 0.997              | 3.0966307834642E-08   |
| RPLP1    | 3.646144                | 1                  | 1                  | 5.94099293022589E-13  |
| RPS2     | 3.60425063              | 1                  | 1                  | 1.78304866256009E-12  |
| CD52     | 3.312556                | 0.984              | 0.983              | 3.73107257708106E-12  |
| SERF2    | 3.210584                | 1                  | 1                  | 6.77465453162876E-18  |
| LGALS3   | 3.07395253              | 0.994              | 0.993              | 0.000105333           |
| MT-CO3   | 2.96139786              | 0.995              | 0.994              | 1.22303986402377E-14  |
| LIPA     | 2.72787398              | 0.739              | 0.657              | 1.35431748969236E-24  |
| RPS18    | 2.64109258              | 1                  | 1                  | 1.30320117340566E-09  |
| CD63     | 2.64089073              | 0.995              | 0.997              | 1.9579969188333E-06   |
| RPS19    | 2.46779056              | 1                  | 1                  | 4.48223041138979E-06  |
| MT-ND1   | 2.38305681              | 0.974              | 0.978              | 7.65533320542562E-10  |
| HCST     | 2.34547552              | 0.944              | 0.929              | 1.48128316603217E-10  |
| RPS12    | 2.13044329              | 0.999              | 1                  | 7.01611580203258E-07  |
| CST3     | 2.06659266              | 0.97               | 0.936              | 2.1328755583256E-40   |
| HIV-E    | 1.95438596              | 0.205              | 0                  | 3.98206455482162E-94  |
| RPL12    | 1.92641452              | 1                  | 1                  | 6.49961562031577E-18  |
| RPS24    | 1.91921404              | 1                  | 1                  | 3.40486584673649E-12  |
| HLA-DRA  | 1.86561341              | 0.837              | 0.8                | 1.0552657746318E-11   |
| S100A4   | 1.85587078              | 0.956              | 0.928              | 1.91223620345853E-13  |
| SH3BGR13 | 1.79990669              | 0.988              | 0.989              | 6.30613233180293E-07  |
| CD74     | 1.70951598              | 0.895              | 0.806              | 1.25136200871898E-22  |
| CTSS     | 1.68194642              | 0.997              | 0.994              | 7.34270077087201E-08  |
| RNASET2  | 1.67245422              | 0.987              | 0.974              | 4.74259925928252E-16  |
| MMP7     | 1.54855768              | 0.151              | 0.1                | 1.07743080250329E-08  |
| ITGB2    | 1.53586528              | 0.991              | 0.982              | 3.7521051901304E-16   |
| CD68     | 1.53464769              | 0.998              | 0.996              | 0.000280833           |
| RPL13    | 1.48574188              | 1                  | 1                  | 0.005643515           |
| GRN      | 1.45708248              | 0.955              | 0.944              | 2.35947286704185E-05  |

|            |            |       |       |                      |
|------------|------------|-------|-------|----------------------|
| MT-CYB     | 1.40209286 | 0.932 | 0.943 | 0.005834318          |
| PLD3       | 1.38792782 | 0.956 | 0.932 | 0.000428907          |
| RPL7A      | 1.36201407 | 1     | 1     | 3.69246145607032E-08 |
| MFSD12     | 1.35688888 | 0.669 | 0.578 | 1.69525888387706E-12 |
| FBP1       | 1.26399667 | 0.859 | 0.833 | 5.8866532890022E-13  |
| HLA-DRB1   | 1.26140633 | 0.706 | 0.562 | 3.05380214847396E-21 |
| IL1RN      | 1.22007542 | 0.687 | 0.652 | 6.26509617302792E-08 |
| ARPC1B     | 1.19874207 | 0.829 | 0.753 | 5.22298580545937E-15 |
| ACTG1      | 1.18345352 | 0.98  | 0.97  | 0.000165805          |
| FN1        | 1.17499386 | 0.261 | 0.215 | 3.00252568584013E-05 |
| CAPG       | 1.13569679 | 0.781 | 0.674 | 2.18070932460538E-16 |
| RPL3       | 1.12824942 | 1     | 1     | 0.005297726          |
| HIV-A      | 1.11859649 | 0.076 | 0     | 1.57722765476768E-32 |
| CTSZ       | 1.0917669  | 0.908 | 0.875 | 0.000220553          |
| RPS8       | 1.08061354 | 1     | 1     | 8.83900751189145E-07 |
| GSN        | 0.94530624 | 0.827 | 0.767 | 2.64237784303551E-16 |
| TGFBI      | 0.90814081 | 0.686 | 0.627 | 6.60171361736484E-05 |
| ANXA2      | 0.90171593 | 0.912 | 0.902 | 4.49528798152653E-10 |
| CYP27A1    | 0.88319988 | 0.918 | 0.893 | 1.75588904598502E-10 |
| C1QA       | 0.87597445 | 0.429 | 0.258 | 1.26697670219142E-24 |
| CYP1B1     | 0.87414504 | 0.745 | 0.678 | 3.34734062705505E-09 |
| LAMP1      | 0.86123133 | 0.8   | 0.685 | 5.33583691501886E-18 |
| HIV-D      | 0.82070175 | 0.175 | 0     | 3.00610205810959E-82 |
| ATP6AP2    | 0.81343928 | 0.871 | 0.817 | 5.74511721727176E-18 |
| TXN        | 0.80952995 | 0.915 | 0.891 | 1.75328330364744E-09 |
| HLA-DPA1   | 0.79387452 | 0.626 | 0.48  | 1.11110664093426E-17 |
| PRDX1      | 0.78999431 | 0.865 | 0.816 | 5.09427458692934E-09 |
| AHNAK      | 0.78879751 | 0.944 | 0.907 | 5.634887145529E-10   |
| RPSA       | 0.7166846  | 0.992 | 0.991 | 7.84878561420627E-06 |
| COX5B      | 0.7121352  | 0.947 | 0.909 | 9.8980302790757E-15  |
| CFL1       | 0.69874741 | 0.821 | 0.773 | 3.97837346470806E-05 |
| TXNRD1     | 0.69343551 | 0.466 | 0.359 | 3.47170311097598E-10 |
| CALM2      | 0.69132468 | 0.828 | 0.775 | 0.005032769          |
| HIV-C      | 0.67684211 | 0.174 | 0     | 3.73016611650886E-83 |
| ADAMDEC1   | 0.66843416 | 0.698 | 0.608 | 0.000461874          |
| RP11-20G13 | 0.65717085 | 0.213 | 0.133 | 2.33933269975118E-15 |
| CALM3      | 0.64179496 | 0.753 | 0.672 | 5.73213608405932E-19 |
| GM2A       | 0.62587129 | 0.74  | 0.628 | 6.01479380208996E-12 |
| HMG20B     | 0.62569236 | 0.638 | 0.559 | 6.8363140283054E-11  |
| IL4I1      | 0.60786315 | 0.627 | 0.525 | 1.97549491517378E-09 |
| STAB1      | 0.60693051 | 0.461 | 0.337 | 5.00173258734789E-09 |
| TMEM176B   | 0.6045596  | 0.675 | 0.544 | 6.52601132203446E-05 |
| MARCO      | 0.5947038  | 0.527 | 0.479 | 0.000221664          |
| ARPC5      | 0.58965418 | 0.833 | 0.756 | 2.18024534266043E-05 |
| HLA-DPB1   | 0.58831503 | 0.554 | 0.41  | 2.56341583776632E-13 |
| GUSB       | 0.58518107 | 0.691 | 0.568 | 2.91195455788321E-16 |
| TIMP2      | 0.57625501 | 0.935 | 0.9   | 4.49191206898825E-10 |
| CCDC88A    | 0.57264735 | 0.805 | 0.714 | 1.06609573840228E-17 |
| CD81       | 0.56775799 | 0.862 | 0.811 | 1.05134433076226E-10 |
| LPL        | 0.5669732  | 0.242 | 0.154 | 9.9530454488868E-16  |
| BCAP31     | 0.56155843 | 0.835 | 0.801 | 1.74979145973442E-11 |
| TREM2      | 0.56012965 | 0.526 | 0.397 | 1.68293854980938E-16 |

|           |            |       |       |                      |
|-----------|------------|-------|-------|----------------------|
| IFI6      | 0.55845013 | 0.393 | 0.28  | 3.02188878414765E-17 |
| GSTO1     | 0.55530055 | 0.97  | 0.972 | 9.74782630841028E-08 |
| HLA-DMA   | 0.53095041 | 0.714 | 0.575 | 2.94913330224203E-14 |
| CD4       | 0.528139   | 0.672 | 0.503 | 5.72530234401081E-29 |
| C9orf16   | 0.52110945 | 0.592 | 0.456 | 4.00215463805563E-14 |
| PLTP      | 0.51709606 | 0.407 | 0.265 | 4.01675271070532E-24 |
| CD36      | 0.51579873 | 0.687 | 0.581 | 0.000950179          |
| PLEK      | 0.51403383 | 0.707 | 0.639 | 0.000157042          |
| CD84      | 0.5126953  | 0.513 | 0.376 | 8.99028005955578E-15 |
| A2M       | 0.50543785 | 0.537 | 0.407 | 2.83982825668342E-16 |
| DBI       | 0.50254686 | 0.836 | 0.77  | 1.41176338371876E-11 |
| CXCL16    | 0.48816396 | 0.897 | 0.855 | 1.73928936001902E-09 |
| COX6C     | 0.48561937 | 0.787 | 0.692 | 9.72495065677728E-10 |
| FAH       | 0.48179496 | 0.564 | 0.46  | 8.89707294408294E-12 |
| C1QC      | 0.47769007 | 0.342 | 0.203 | 1.72717420963551E-11 |
| CTSH      | 0.47210122 | 0.849 | 0.775 | 5.94550470333261E-16 |
| VMO1      | 0.47124722 | 0.366 | 0.262 | 3.79148188114381E-07 |
| CYB5A     | 0.4663307  | 0.591 | 0.443 | 3.01510447149397E-26 |
| IQGAP2    | 0.46306105 | 0.699 | 0.562 | 3.21147515223582E-14 |
| HEXA      | 0.45613423 | 0.836 | 0.747 | 7.64010499082084E-09 |
| FAM20C    | 0.43514595 | 0.553 | 0.449 | 1.35182025050634E-12 |
| TNFSF13B  | 0.43475058 | 0.593 | 0.467 | 3.51898809271789E-07 |
| NDUFS5    | 0.4312936  | 0.902 | 0.859 | 1.03704667086294E-07 |
| FDX1      | 0.43102669 | 0.46  | 0.345 | 3.70996993377064E-17 |
| PLEKHO1   | 0.42841768 | 0.658 | 0.549 | 1.47041925076302E-06 |
| APMAP     | 0.42549977 | 0.698 | 0.567 | 1.60536912701806E-10 |
| ATP5G3    | 0.42477259 | 0.845 | 0.792 | 1.03236997380561E-10 |
| SCARB2    | 0.42417042 | 0.719 | 0.59  | 2.10264007951796E-14 |
| FERMT3    | 0.41148006 | 0.683 | 0.585 | 3.06866055042292E-07 |
| EEF1B2    | 0.40653804 | 0.982 | 0.986 | 1.76888638606499E-06 |
| ALCAM     | 0.40513084 | 0.442 | 0.361 | 5.6018296802576E-09  |
| RPS6      | 0.40290292 | 1     | 1     | 0.001070679          |
| CD86      | 0.40210205 | 0.702 | 0.578 | 1.8276529709926E-12  |
| MGST1     | 0.40201525 | 0.797 | 0.771 | 5.11620641481427E-06 |
| CECR1     | 0.40002464 | 0.689 | 0.586 | 2.58656472533261E-08 |
| ANXA11    | 0.39128512 | 0.775 | 0.682 | 9.19318590328564E-12 |
| KIAA0930  | 0.37740213 | 0.719 | 0.639 | 0.0012258            |
| CCL22     | 0.37142003 | 0.067 | 0.042 | 6.00738856724274E-05 |
| PYCARD    | 0.36049638 | 0.713 | 0.58  | 1.72766643813858E-08 |
| ITGAM     | 0.35742269 | 0.759 | 0.668 | 2.64320210433332E-17 |
| PTPN6     | 0.35720978 | 0.621 | 0.533 | 0.000107355          |
| CRABP2    | 0.35677234 | 0.144 | 0.093 | 3.49727738712561E-06 |
| SLC7A7    | 0.35529427 | 0.65  | 0.52  | 2.42672227474195E-20 |
| MGLL      | 0.352509   | 0.393 | 0.312 | 0.001701987          |
| CTSC      | 0.34787351 | 0.522 | 0.401 | 4.97773251447225E-12 |
| NPL       | 0.34638556 | 0.64  | 0.529 | 1.46774205023894E-05 |
| CIR1      | 0.34493622 | 0.619 | 0.543 | 0.002230914          |
| TGFB1     | 0.3427214  | 0.727 | 0.662 | 0.000235504          |
| TM4SF19.1 | 0.33818825 | 0.173 | 0.112 | 2.99527822154948E-05 |
| MYL12A    | 0.33253521 | 0.896 | 0.855 | 0.001028125          |
| C3        | 0.32639317 | 0.421 | 0.361 | 4.67480115477377E-06 |
| BCL2A1    | 0.32593234 | 0.519 | 0.493 | 4.42397995400518E-06 |

|            |            |       |       |                      |
|------------|------------|-------|-------|----------------------|
| PGD        | 0.3252608  | 0.728 | 0.643 | 1.53092377260591E-10 |
| RP11-290F2 | 0.32382363 | 0.636 | 0.54  | 0.001336782          |
| PRKAR1A    | 0.32348421 | 0.779 | 0.72  | 1.12503595772318E-08 |
| ASAP1      | 0.32246336 | 0.693 | 0.622 | 8.66033700427632E-13 |
| MATK       | 0.31931245 | 0.401 | 0.322 | 3.68097235672835E-08 |
| CYSTM1     | 0.31582565 | 0.543 | 0.452 | 2.85116540999432E-09 |
| TMEM91     | 0.31184538 | 0.77  | 0.689 | 6.29895159059177E-09 |
| PPT1       | 0.31008864 | 0.499 | 0.39  | 8.15278677143277E-11 |
| SLC25A5    | 0.30856326 | 0.56  | 0.475 | 4.73365327622889E-09 |
| RHOC       | 0.30805197 | 0.348 | 0.238 | 4.23841191708565E-11 |
| C1orf54    | 0.30301028 | 0.44  | 0.306 | 9.39820706564624E-18 |
| MS4A4A     | 0.30257731 | 0.496 | 0.364 | 1.95518419241863E-14 |
| DNAJC5B    | 0.29877158 | 0.298 | 0.192 | 1.66171910675391E-12 |
| ATP6V1D    | 0.29668656 | 0.429 | 0.345 | 7.01751951840412E-06 |
| HLA-DMB    | 0.29391196 | 0.385 | 0.267 | 9.37206826773246E-09 |
| G6PD       | 0.29350026 | 0.336 | 0.254 | 9.03343901176162E-06 |
| FKBP1A     | 0.29285399 | 0.518 | 0.419 | 1.32755999078363E-05 |
| SCPEP1     | 0.2836126  | 0.552 | 0.446 | 1.91731694676393E-08 |
| MNDA       | 0.28092691 | 0.399 | 0.313 | 2.36624465395901E-07 |
| C1QB       | 0.28041554 | 0.138 | 0.061 | 5.13712982459078E-08 |
| CD59       | 0.27968279 | 0.373 | 0.269 | 1.18937984199839E-13 |
| UCP2       | 0.27456129 | 0.361 | 0.256 | 5.96701921329582E-06 |
| ITGB1BP1   | 0.27269883 | 0.396 | 0.293 | 2.6647478128876E-13  |
| MSR1       | 0.27198005 | 0.333 | 0.205 | 2.9005432498938E-13  |
| EMP1       | 0.27189113 | 0.424 | 0.345 | 7.64470833732777E-05 |
| DAD1       | 0.26971548 | 0.771 | 0.713 | 0.000519773          |
| NDUFB2     | 0.26252858 | 0.559 | 0.469 | 0.004146968          |
| IL2RG      | 0.2623476  | 0.519 | 0.403 | 2.19199653310935E-08 |
| HAVCR2     | 0.26208384 | 0.477 | 0.353 | 3.41831167540038E-13 |
| GLA        | 0.25757282 | 0.435 | 0.332 | 1.20164653136836E-05 |
| HLA-DQB1   | 0.25564421 | 0.375 | 0.263 | 7.02432747675259E-05 |
| GCLC       | 0.25418231 | 0.242 | 0.158 | 1.73235905284338E-10 |
| LGALS9     | 0.25175796 | 0.531 | 0.419 | 5.4831336745031E-11  |
| GPRIN3     | 0.24992964 | 0.493 | 0.374 | 2.03522280485921E-09 |
| RAB31      | 0.24843863 | 0.492 | 0.379 | 7.19261554689887E-08 |
| HM13       | 0.24816702 | 0.571 | 0.484 | 7.42032669374114E-05 |
| C4orf48    | 0.247584   | 0.419 | 0.31  | 8.66010699808101E-11 |
| SQRDL      | 0.24552567 | 0.665 | 0.579 | 1.68520909149794E-10 |
| PRKCB      | 0.24400578 | 0.467 | 0.356 | 1.42225922223654E-10 |
| COX7B      | 0.24332764 | 0.782 | 0.746 | 0.002425224          |
| TUBA1A     | 0.24301891 | 0.384 | 0.286 | 0.000100066          |
| PTGR1      | 0.24258932 | 0.33  | 0.233 | 4.05599246464196E-05 |
| MSN        | 0.24038141 | 0.59  | 0.487 | 0.002910971          |
| SAMSN1     | 0.24001303 | 0.494 | 0.4   | 1.43021712132876E-06 |
| RAC2       | 0.23935577 | 0.839 | 0.825 | 1.06640431946755E-05 |
| YWHAQ      | 0.23580619 | 0.565 | 0.49  | 8.3593393797352E-10  |
| CHCHD10    | 0.23433927 | 0.759 | 0.698 | 0.000163045          |
| MYOF       | 0.23387593 | 0.435 | 0.345 | 1.92383633514496E-07 |
| CYB561A3   | 0.23309719 | 0.366 | 0.252 | 7.88301130891952E-05 |
| SEMA3C     | 0.23063014 | 0.416 | 0.31  | 3.46570931974319E-07 |
| OAS1       | 0.22758188 | 0.256 | 0.151 | 5.10248445099398E-10 |
| NCEH1      | 0.2269674  | 0.392 | 0.29  | 8.60606046960138E-07 |

|            |            |       |       |                      |
|------------|------------|-------|-------|----------------------|
| MPG        | 0.20853987 | 0.533 | 0.429 | 4.59545594385444E-06 |
| NRP2       | 0.20162686 | 0.449 | 0.349 | 7.51560101670415E-07 |
| IL18       | 0.19754559 | 0.459 | 0.333 | 6.87425904401937E-12 |
| C20orf24   | 0.19581051 | 0.388 | 0.309 | 9.00909944694302E-05 |
| GLIPR2     | 0.19479986 | 0.445 | 0.347 | 9.59957149396457E-05 |
| CHST11     | 0.19289888 | 0.596 | 0.506 | 0.000115284          |
| TNS3       | 0.1907448  | 0.456 | 0.374 | 0.000439948          |
| ITGB7      | 0.1898966  | 0.3   | 0.204 | 2.66081500923694E-08 |
| HLA-DQA1   | 0.18677858 | 0.213 | 0.11  | 1.75587160750391E-10 |
| IL1R2      | 0.18573717 | 0.092 | 0.044 | 2.48118799720161E-06 |
| MT-ND6     | 0.18405953 | 0.347 | 0.252 | 6.87604487102819E-09 |
| SCD        | 0.18197648 | 0.414 | 0.336 | 0.001128042          |
| SPARC      | 0.18107421 | 0.178 | 0.113 | 1.6356596761253E-06  |
| PHLDA3     | 0.17788971 | 0.248 | 0.153 | 1.61677506678712E-10 |
| LDHB       | 0.17721205 | 0.403 | 0.294 | 1.48094626957708E-09 |
| GALM       | 0.17487441 | 0.325 | 0.224 | 1.5834978387459E-09  |
| MRAS       | 0.17250178 | 0.301 | 0.201 | 5.98133659733292E-08 |
| SERPINE1   | 0.16981977 | 0.416 | 0.349 | 0.000436826          |
| LGMN       | 0.16973149 | 0.327 | 0.225 | 0.000152451          |
| ATP6V0D2   | 0.16827657 | 0.328 | 0.229 | 2.32262163557302E-05 |
| GPC4       | 0.16677018 | 0.173 | 0.124 | 4.40199023286389E-06 |
| CHD4       | 0.16611606 | 0.36  | 0.266 | 0.000948807          |
| CD300LB    | 0.16503023 | 0.295 | 0.205 | 0.000348711          |
| ABHD2      | 0.16427904 | 0.429 | 0.343 | 0.005998062          |
| FRMD4B     | 0.15935342 | 0.257 | 0.164 | 2.42419247884932E-05 |
| ST14       | 0.15716748 | 0.392 | 0.302 | 0.005720561          |
| ITGB5      | 0.15544276 | 0.233 | 0.135 | 4.26489410776887E-08 |
| CD97       | 0.15405086 | 0.377 | 0.293 | 5.49951043893544E-05 |
| METTL7A    | 0.15390937 | 0.251 | 0.149 | 8.62725862506868E-09 |
| DCXR       | 0.1535756  | 0.365 | 0.281 | 0.009918355          |
| AMFR       | 0.15314844 | 0.436 | 0.352 | 0.00224651           |
| EMILIN1    | 0.15172727 | 0.173 | 0.11  | 0.000228089          |
| RRBP1      | 0.14977127 | 0.263 | 0.182 | 0.000945342          |
| LAIR1      | 0.14812778 | 0.317 | 0.215 | 6.91540475273607E-06 |
| NR1H3      | 0.14742995 | 0.221 | 0.135 | 4.50538126709038E-08 |
| SLC12A8    | 0.1464051  | 0.188 | 0.114 | 1.36884113397491E-05 |
| HK3        | 0.14607211 | 0.245 | 0.167 | 8.41350890892295E-08 |
| MTSS1      | 0.14589632 | 0.42  | 0.327 | 0.001798289          |
| RGS1       | 0.14474724 | 0.468 | 0.425 | 0.000395151          |
| MYO1E      | 0.14266427 | 0.25  | 0.181 | 0.000126896          |
| CAMK1      | 0.14194564 | 0.348 | 0.251 | 0.000128231          |
| FABP3      | 0.1412391  | 0.173 | 0.088 | 9.4223716157189E-13  |
| RP11-680A1 | 0.14006584 | 0.238 | 0.154 | 5.98284968811168E-09 |
| HN1        | 0.13950041 | 0.266 | 0.183 | 0.002344803          |
| RAMP1      | 0.1390508  | 0.163 | 0.091 | 0.001151691          |
| SERINC2    | 0.13202078 | 0.241 | 0.152 | 8.81099777712972E-05 |
| SRD5A3     | 0.13197354 | 0.255 | 0.164 | 6.09100955445243E-10 |
| EPB41L2    | 0.12536612 | 0.197 | 0.117 | 7.25440506791195E-07 |
| HMGA1      | 0.12231661 | 0.58  | 0.523 | 0.006674659          |
| COL6A1     | 0.12053122 | 0.081 | 0.043 | 0.001940983          |
| UBE2E3     | -0.0444246 | 0.2   | 0.216 | 5.93625392577912E-06 |
| CDCP1      | -0.0456135 | 0.077 | 0.097 | 9.28887385396896E-05 |

|            |            |       |       |                      |
|------------|------------|-------|-------|----------------------|
| EFNA5      | -0.046297  | 0.138 | 0.16  | 0.001866052          |
| H1F0       | -0.0479353 | 0.353 | 0.355 | 1.47908364006907E-07 |
| WDR74      | -0.0576325 | 0.29  | 0.298 | 2.68289034905878E-09 |
| AKR1B1     | -0.0592565 | 0.346 | 0.347 | 0.001233549          |
| HAUS6      | -0.0595456 | 0.193 | 0.204 | 6.41350272081568E-09 |
| NKG7       | -0.0615751 | 0.04  | 0.04  | 0.00794804           |
| HIST1H2BK  | -0.0624545 | 0.247 | 0.25  | 0.00075872           |
| NUPL1      | -0.0648974 | 0.446 | 0.441 | 6.01921819531557E-05 |
| SEMA4D     | -0.0654029 | 0.192 | 0.223 | 1.69409000694273E-15 |
| STK17B     | -0.0797297 | 0.512 | 0.52  | 0.003277337          |
| MXD1       | -0.0816153 | 0.399 | 0.423 | 0.000558631          |
| DENND5A    | -0.0823857 | 0.432 | 0.445 | 5.17016305894487E-05 |
| IRS2       | -0.0872615 | 0.374 | 0.389 | 0.00135465           |
| MARCKSL1   | -0.0880192 | 0.266 | 0.294 | 2.53060225789876E-09 |
| ITPR1      | -0.0918514 | 0.381 | 0.384 | 1.5265434331112E-08  |
| KLRB1      | -0.0933496 | 0.009 | 0.014 | 3.41849810674847E-05 |
| EVI2A      | -0.0946639 | 0.758 | 0.786 | 2.32200038308081E-05 |
| KLF10      | -0.1005122 | 0.585 | 0.613 | 2.15622293972048E-10 |
| YPEL3      | -0.1022446 | 0.782 | 0.815 | 0.007179463          |
| GNLY       | -0.1032693 | 0.005 | 0.012 | 1.76952529214245E-09 |
| H1FX       | -0.1034143 | 0.675 | 0.681 | 1.36748555636489E-06 |
| FCAR       | -0.107519  | 0.285 | 0.32  | 1.74224788669256E-06 |
| RYBP       | -0.108751  | 0.433 | 0.45  | 1.59295556535117E-11 |
| CHML       | -0.1113931 | 0.247 | 0.272 | 0.002763882          |
| SLC38A2    | -0.1114619 | 0.697 | 0.713 | 0.003891615          |
| RNMT       | -0.1123166 | 0.678 | 0.687 | 0.000274047          |
| PIK3R5     | -0.115438  | 0.373 | 0.403 | 2.46011329217874E-10 |
| SNORD3B-2  | -0.1171475 | 0.175 | 0.206 | 1.77954489859626E-05 |
| TXNIP      | -0.1199761 | 0.982 | 0.983 | 1.94970269560917E-20 |
| EPB41L4A-A | -0.1201454 | 0.57  | 0.617 | 0.000456164          |
| MT-ND2     | -0.1253205 | 0.983 | 0.986 | 8.72075262227085E-05 |
| HNRNPH1    | -0.125656  | 0.75  | 0.772 | 0.007378643          |
| CSRNP1     | -0.1275962 | 0.261 | 0.311 | 0.00109291           |
| P4HA1      | -0.1321424 | 0.957 | 0.956 | 5.29384962458978E-06 |
| BTG2       | -0.1333077 | 0.63  | 0.665 | 0.000352564          |
| VAMP2      | -0.1344888 | 0.521 | 0.556 | 1.07007932766391E-08 |
| HIST1H1C   | -0.1355367 | 0.445 | 0.459 | 5.25979988033401E-05 |
| SLC3A2     | -0.1415489 | 0.751 | 0.768 | 1.42628064940693E-06 |
| RP11-1143G | -0.1476184 | 0.656 | 0.675 | 5.20341212775805E-06 |
| ZNF395     | -0.1566768 | 0.676 | 0.713 | 6.22207090227875E-08 |
| SRSF7      | -0.1746026 | 0.684 | 0.71  | 2.11960584464041E-05 |
| SNAPC1     | -0.1809266 | 0.36  | 0.39  | 6.25409416501065E-12 |
| FUS        | -0.2076735 | 0.767 | 0.792 | 5.87313174090968E-09 |
| GPI        | -0.2158421 | 0.829 | 0.837 | 2.74853650471564E-08 |
| GPCPD1     | -0.2202263 | 0.639 | 0.691 | 1.604063789388E-07   |
| CLK1       | -0.2233413 | 0.581 | 0.633 | 0.00084034           |
| BRD2       | -0.2260702 | 0.661 | 0.705 | 0.001191429          |
| MAP3K2     | -0.2359323 | 0.791 | 0.821 | 5.76618089060295E-05 |
| CREBRF     | -0.2369013 | 0.655 | 0.697 | 2.48624415481678E-07 |
| DDIT4      | -0.2412791 | 0.61  | 0.647 | 5.20491888232014E-09 |
| ARRDC3     | -0.2458836 | 0.836 | 0.877 | 7.61264012948357E-06 |
| CITED2     | -0.250387  | 0.514 | 0.542 | 0.009280617          |

|            |            |       |       |                      |
|------------|------------|-------|-------|----------------------|
| IFNGR2     | -0.2677052 | 0.821 | 0.864 | 0.000123245          |
| ALOX5AP    | -0.3157613 | 0.681 | 0.758 | 0.000846579          |
| MXI1       | -0.3466479 | 0.8   | 0.837 | 5.61572535817819E-14 |
| RPS27      | -0.3664257 | 1     | 1     | 6.35942734492334E-11 |
| BZW1       | -0.3877095 | 0.828 | 0.854 | 3.96006338534402E-07 |
| FOSL2      | -0.3881581 | 0.719 | 0.786 | 2.708985905017E-07   |
| DUSP6      | -0.4068133 | 0.649 | 0.708 | 0.000133589          |
| OPN3       | -0.4311403 | 0.433 | 0.523 | 8.01546233209178E-28 |
| SLC11A1    | -0.5529422 | 0.824 | 0.865 | 3.22429824175406E-05 |
| CTB-61M7.2 | -0.5966513 | 0.486 | 0.585 | 3.98254213783839E-23 |
| PNRC1      | -0.6615171 | 0.958 | 0.967 | 5.23718215847277E-10 |
| VEGFA      | -0.6795621 | 0.804 | 0.858 | 4.1367174186637E-05  |
| HILPDA     | -0.6826048 | 0.755 | 0.784 | 1.90572337165755E-06 |
| CXCR4      | -0.7062109 | 0.798 | 0.851 | 4.71074006340168E-17 |
| IER2       | -0.7291065 | 0.779 | 0.838 | 5.9145836836879E-14  |
| FCGR2B     | -0.7641098 | 0.777 | 0.845 | 4.20468796360072E-09 |
| JUNB       | -0.8203021 | 0.968 | 0.973 | 1.92624781711041E-11 |
| EGR1       | -1.0125078 | 0.753 | 0.826 | 7.58623170916667E-09 |
| SLC2A3     | -1.026361  | 0.933 | 0.95  | 0.001325993          |
| NDRG1      | -1.0488384 | 0.952 | 0.969 | 5.48838349865104E-16 |
| JUND       | -1.3043117 | 0.966 | 0.98  | 5.40404856610453E-22 |
| GLUL       | -1.7898066 | 0.991 | 0.996 | 3.85667338477518E-19 |
| JUN        | -1.8417747 | 0.94  | 0.966 | 0.007828701          |
| H3F3B      | -1.9931806 | 0.997 | 0.998 | 3.03728987727315E-14 |
| DUSP1      | -2.3531496 | 0.942 | 0.968 | 1.93129426265017E-10 |
| ZFP36L1    | -2.3751693 | 0.985 | 0.988 | 2.10075663970255E-22 |
| FOS        | -3.1182203 | 0.955 | 0.975 | 1.39238073348505E-07 |
| NFKBIA     | -3.6772163 | 0.838 | 0.907 | 1.32058592142897E-07 |
| BTG1       | -3.9523298 | 0.979 | 0.986 | 5.34349163833493E-22 |
| PLIN2      | -5.8744952 | 0.998 | 0.998 | 4.89202389614637E-43 |
| MT1X       | -6.3815528 | 0.495 | 0.635 | 2.02316151841871E-11 |
| MT2A       | -7.1116495 | 0.709 | 0.795 | 8.90930803611087E-07 |
| LYZ        | -12.542648 | 0.999 | 0.999 | 3.20003137593781E-08 |
| MALAT1     | -14.980666 | 1     | 1     | 0.000187218          |
| IL8        | -16.412568 | 0.887 | 0.938 | 4.39617278382751E-19 |

**Footnotes:**

- 1- Value refers to average differential expression within one subset of scaled pearsons residuals
- 2- Percentage of cells, within the cluster ID for which the gene is a marker, that detect the gene
- 3- Percentage of all the other cells, excluding the cluster ID for which the gene is a marker. that detect the gene
