# Supplementary material for: Interactions of Monocytes, HIV, and ART Identified by an Innovative scRNAseq Pipeline: Pathways to Reservoirs and HIV-Associated Comorbidities
Source: PubMed Central journal article supplement (PMC7387797; doi:10.1128/mbio.01037-20), 2020-07-28
Supplement: mBio.01037-20-st002.pdf [file mBio.01037-20-st002.pdf]

**Supplementary Table 2:** List of differentially expressed genes between HIV<sup>r</sup> and HIV<sup>exp</sup> in every cluster from the integrated dataset of HIV-infected mature monocytes without ART-treatment (Cluster X HIV<sup>r</sup> vs Cluster X HIV<sup>exp</sup>).

| Gene.ID | Avg. Diff. <sup>1</sup> | Pct.1 <sup>2</sup> | Pct.2 <sup>3</sup> | P.Value.Adj | Cluster.ID | Comments                                     |
|---------|-------------------------|--------------------|--------------------|-------------|------------|----------------------------------------------|
| TMSB4X  | 11.1144285              | 1                  | 0.999              | 1.15E-14    | 0          |                                              |
| CTSB    | 7.049561559             | 0.988              | 0.991              | 8.45E-05    | 0          |                                              |
| B2M     | 6.184487622             | 1                  | 1                  | 2.34E-07    | 0          |                                              |
| MT-CO2  | 4.614835097             | 0.974              | 0.978              | 4.22E-12    | 0          |                                              |
| APOE    | 3.13683342              | 0.798              | 0.745              | 2.63E-06    | 0          |                                              |
| HIV-B   | 2.720394737             | 0.617              | 0                  | 1.71E-68    | 0          | Shared with clusters 0, 1, 2, 3, 4, 5, and 6 |
| CST3    | 2.388406298             | 0.933              | 0.856              | 3.09E-10    | 0          |                                              |
| CTSS    | 2.354135649             | 0.99               | 0.989              | 0.003862474 | 0          |                                              |
| RPS12   | 2.258222392             | 1                  | 1                  | 0.004373775 | 0          |                                              |
| MT-CO3  | 1.876522474             | 0.992              | 0.991              | 0.000250267 | 0          |                                              |
| ARL4C   | 1.796760879             | 0.724              | 0.508              | 4.61E-05    | 0          |                                              |
| TGFB1   | 1.701596969             | 0.735              | 0.528              | 5.02E-05    | 0          |                                              |
| CD74    | 1.679335767             | 0.768              | 0.62               | 0.003431825 | 0          |                                              |
| HIV-E   | 1.417763158             | 0.215              | 0                  | 1.42E-21    | 0          | Shared with clusters 0, 1, 2, 3, and 4       |
| STAB1   | 0.943294705             | 0.479              | 0.249              | 7.56E-05    | 0          |                                              |
| RPSA    | 0.875490345             | 0.993              | 0.989              | 0.006221981 | 0          |                                              |
| CXCL16  | 0.835601018             | 0.928              | 0.834              | 9.53E-05    | 0          |                                              |
| HIV-A   | 0.675986842             | 0.072              | 0                  | 2.71E-05    | 0          | Shared with clusters 0, 1, and 3             |
| LAMP1   | 0.619859519             | 0.709              | 0.498              | 0.007567526 | 0          |                                              |
| HIV-D   | 0.550986842             | 0.169              | 0                  | 6.12E-17    | 0          | Shared with clusters 0, 1, 2, 3, 4, and 6    |
| CD4     | 0.539252938             | 0.551              | 0.356              | 0.003137077 | 0          | Shared with clusters 0 and 3                 |
| HIV-C   | 0.529605263             | 0.186              | 0                  | 1.47E-19    | 0          | Shared with clusters 0, 1, 2, 3, 4, and 6    |
| DOCK4   | 0.439336015             | 0.562              | 0.398              | 0.006655337 | 0          |                                              |
| MT-ND5  | 0.358303453             | 0.891              | 0.917              | 0.000507561 | 0          |                                              |
| CYB5A   | 0.300106961             | 0.414              | 0.248              | 0.000421329 | 0          |                                              |
| MT-ND4  | -0.238983649            | 0.995              | 0.996              | 0.001462902 | 0          |                                              |
| CD9     | -0.54575615             | 0.969              | 0.973              | 0.000682287 | 0          | Shared with clusters 0 and 4                 |
| ANXA5   | -0.576140485            | 0.9                | 0.922              | 0.00019041  | 0          |                                              |
| OPN3    | -0.661790098            | 0.526              | 0.625              | 2.19E-06    | 0          |                                              |
| BZW1    | -0.681177986            | 0.836              | 0.886              | 0.001793812 | 0          | Shared with clusters 0 and 7                 |
| RGCC    | -1.519501363            | 0.724              | 0.826              | 2.64E-07    | 0          |                                              |
| PLIN2   | -7.27084755             | 1                  | 1                  | 1.59E-09    | 0          |                                              |
| HIV-B   | 2.10663199              | 0.628              | 0                  | 2.08E-78    | 1          | Shared with clusters 0, 1, 2, 3, 4, 5, and 6 |
| C1QA    | 1.005827456             | 0.586              | 0.431              | 0.003076753 | 1          |                                              |
| HIV-E   | 0.77503251              | 0.218              | 0                  | 1.45E-26    | 1          | Shared with clusters 0, 1, 2, 3, and 4       |
| HIV-A   | 0.486345904             | 0.079              | 0                  | 1.67E-07    | 1          | Shared with clusters 0, 1, and 3             |
| HIV-D   | 0.461638492             | 0.183              | 0                  | 1.64E-22    | 1          | Shared with clusters 0, 1, 2, 3, 4, and 6    |
| HIV-C   | 0.317295189             | 0.168              | 0                  | 2.86E-20    | 1          | Shared with clusters 0, 1, 2, 3, 4, and 6    |
| JUNB    | -1.012443099            | 0.995              | 0.992              | 2.80E-06    | 1          |                                              |
| NFKBIA  | -3.893012207            | 0.87               | 0.92               | 0.001695477 | 1          |                                              |
| IL8     | -12.67445183            | 0.935              | 0.962              | 0.00031458  | 1          |                                              |
| HIV-B   | 8.45014245              | 0.567              | 0                  | 1.22E-37    | 2          | Shared with clusters 0, 1, 2, 3, 4, 5, and 6 |
| HIV-E   | 3.96011396              | 0.202              | 0                  | 2.79E-11    | 2          | Shared with clusters 0, 1, 2, 3, and 4       |
| HIV-D   | 1.715099715             | 0.168              | 0                  | 8.99E-09    | 2          | Shared with clusters 0, 1, 2, 3, 4, and 6    |
| HIV-C   | 1.393162393             | 0.174              | 0                  | 1.43E-09    | 2          | Shared with clusters 0, 1, 2, 3, 4, and 6    |
| FAM101B | -0.127126622            | 0.071              | 0.165              | 7.17E-05    | 2          | Shared with clusters 2 and 7                 |
| HIV-B   | 4.781395349             | 0.451              | 0                  | 3.84E-40    | 3          | Shared with clusters 0, 1, 2, 3, 4, 5, and 6 |
| LGALS1  | 3.5088376               | 0.997              | 0.998              | 0.000495701 | 3          |                                              |
| HIV-E   | 2.724031008             | 0.175              | 0                  | 2.58E-14    | 3          | Shared with clusters 0, 1, 2, 3, and 4       |
| RPS8    | 1.774520141             | 1                  | 0.999              | 0.000416713 | 3          |                                              |
| HIV-A   | 1.421705426             | 0.085              | 0                  | 7.29E-07    | 3          | Shared with clusters 0, 1, and 3             |
| HIV-D   | 1.029457364             | 0.158              | 0                  | 2.46E-14    | 3          | Shared with clusters 0, 1, 2, 3, 4, and 6    |
| HIV-C   | 0.849612403             | 0.16               | 0                  | 2.86E-14    | 3          | Shared with clusters 0, 1, 2, 3, 4, and 6    |
| PLTP    | 0.832233027             | 0.668              | 0.532              | 9.06E-07    | 3          |                                              |
| CD4     | 0.366900494             | 0.611              | 0.473              | 1.39E-05    | 3          | Shared with clusters 0 and 3                 |
| FCGR2A  | -0.212590065            | 0.398              | 0.423              | 0.008505055 | 3          |                                              |
| PLD3    | -0.852577471            | 0.991              | 0.994              | 2.81E-05    | 3          |                                              |

|              |              |       |       |             |   |                                              |
|--------------|--------------|-------|-------|-------------|---|----------------------------------------------|
| CTSD         | -2.585266924 | 0.998 | 0.999 | 7.04E-06    | 3 |                                              |
| HIV-B        | 1.5          | 0.612 | 0     | 2.45E-20    | 4 | Shared with clusters 0, 1, 2, 3, 4, 5, and 6 |
| HIV-E        | 0.49375      | 0.244 | 0     | 2.18E-06    | 4 | Shared with clusters 0, 1, 2, 3, and 4       |
| HIV-D        | 0.36875      | 0.175 | 0     | 0.001269966 | 4 | Shared with clusters 0, 1, 2, 3, 4, and 6    |
| HIV-C        | 0.31875      | 0.175 | 0     | 0.001114827 | 4 | Shared with clusters 0, 1, 2, 3, 4, and 6    |
| LGALS2       | 0.29748193   | 0.625 | 0.379 | 3.88E-05    | 4 |                                              |
| C16orf98     | -0.04336895  | 0     | 0.03  | 2.39E-06    | 4 |                                              |
| GNB5         | -0.057196732 | 0     | 0.029 | 6.39E-08    | 4 |                                              |
| PM20D2       | -0.095014928 | 0.012 | 0.055 | 0.002003789 | 4 |                                              |
| MME          | -0.153680861 | 0.038 | 0.089 | 0.002734286 | 4 |                                              |
| TUBA4A       | -0.284785512 | 0.188 | 0.262 | 0.008212208 | 4 |                                              |
| CD63         | -1.245266342 | 0.988 | 1     | 0.006273682 | 4 |                                              |
| CD9          | -1.583764142 | 0.988 | 0.994 | 0.001909262 | 4 | Shared with clusters 0 and 4                 |
| SDC2         | -2.111348994 | 0.981 | 0.992 | 4.12E-05    | 4 |                                              |
| HILPDA       | -2.31105044  | 0.956 | 0.97  | 0.002130011 | 4 |                                              |
| SRGN         | -4.019374607 | 0.994 | 1     | 0.002098447 | 4 |                                              |
| RPL30        | -4.592791483 | 1     | 1     | 0.002909382 | 4 |                                              |
| MT2A         | -7.044512099 | 0.994 | 0.98  | 0.003708604 | 4 |                                              |
| HIV-B        | 9.952941176  | 0.694 | 0     | 5.40E-07    | 5 | Shared with clusters 0, 1, 2, 3, 4, 5, and 6 |
| FCGR1A       | -0.045304778 | 0     | 0.033 | 4.06E-05    | 5 |                                              |
| TJP2         | -0.046952224 | 0     | 0.038 | 2.48E-06    | 5 |                                              |
| EBLN2        | -0.049423394 | 0     | 0.036 | 2.25E-11    | 5 |                                              |
| THBD         | -0.076141099 | 0.024 | 0.044 | 4.30E-05    | 5 |                                              |
| ARHGAP26     | -0.100281035 | 0.082 | 0.128 | 0.003908121 | 5 |                                              |
| SLC25A37     | -0.119604613 | 0.165 | 0.157 | 0.003139514 | 5 |                                              |
| HIV-B        | 4.617486339  | 0.705 | 0     | 5.68E-26    | 6 | Shared with clusters 0, 1, 2, 3, 4, 5, and 6 |
| HIV-C        | 0.699453552  | 0.208 | 0     | 4.64E-05    | 6 | Shared with clusters 0, 1, 2, 3, 4, and 6    |
| HIV-D        | 0.590163934  | 0.213 | 0     | 3.68E-05    | 6 | Shared with clusters 0, 1, 2, 3, 4, and 6    |
| LTA          | -0.046956522 | 0     | 0.038 | 0.008554923 | 7 |                                              |
| HAPLN3       | -0.048695652 | 0     | 0.042 | 0.002535767 | 7 |                                              |
| ZNF445       | -0.052173913 | 0     | 0.037 | 0.004260847 | 7 |                                              |
| LRIG1        | -0.053913043 | 0     | 0.045 | 0.000918545 | 7 |                                              |
| RP11-284N8.3 | -0.055652174 | 0     | 0.049 | 0.00026238  | 7 |                                              |
| LMOD3        | -0.057391304 | 0     | 0.04  | 0.007758803 | 7 |                                              |
| CD200R1      | -0.064347826 | 0     | 0.05  | 0.000138572 | 7 |                                              |
| EPB41L2      | -0.066086957 | 0     | 0.038 | 0.006524215 | 7 |                                              |
| SIDT1        | -0.066086957 | 0     | 0.049 | 0.000326458 | 7 |                                              |
| UBE2O        | -0.066086957 | 0     | 0.042 | 0.002050051 | 7 |                                              |
| KLHL15       | -0.067826087 | 0     | 0.04  | 0.006582756 | 7 |                                              |
| MPP6         | -0.069565217 | 0     | 0.042 | 0.004412425 | 7 |                                              |
| ATP8A1       | -0.073043478 | 0     | 0.043 | 0.003008923 | 7 |                                              |
| MAD2L1       | -0.073043478 | 0     | 0.047 | 0.001691633 | 7 |                                              |
| AC132872.2   | -0.076521739 | 0     | 0.045 | 0.002291322 | 7 |                                              |
| FAM84B       | -0.076521739 | 0     | 0.056 | 3.50E-05    | 7 |                                              |
| LAG3         | -0.07826087  | 0     | 0.045 | 0.00120386  | 7 |                                              |
| OTUD7B       | -0.083478261 | 0     | 0.049 | 0.000871689 | 7 |                                              |
| METTL2B      | -0.085217391 | 0     | 0.052 | 0.007220328 | 7 |                                              |
| TSPYL4       | -0.088695652 | 0     | 0.054 | 0.000410937 | 7 |                                              |
| HSPA1B       | -0.093913043 | 0     | 0.052 | 0.003911148 | 7 |                                              |
| FEZ1         | -0.097391304 | 0     | 0.052 | 0.000108894 | 7 |                                              |
| HIC1         | -0.099130435 | 0     | 0.056 | 3.76E-05    | 7 |                                              |
| KIAA0922     | -0.102608696 | 0     | 0.059 | 1.35E-05    | 7 |                                              |
| RPS6KA5      | -0.106086957 | 0     | 0.059 | 4.07E-05    | 7 |                                              |
| EOMES        | -0.107826087 | 0     | 0.056 | 3.40E-05    | 7 |                                              |
| POLG2        | -0.107826087 | 0     | 0.059 | 2.29E-05    | 7 |                                              |
| GSAP         | -0.113043478 | 0     | 0.057 | 0.000171158 | 7 |                                              |
| SLFN11       | -0.11826087  | 0     | 0.064 | 1.57E-06    | 7 |                                              |
| TMEM138      | -0.123478261 | 0     | 0.064 | 6.27E-08    | 7 |                                              |
| DDI2         | -0.132173913 | 0     | 0.068 | 0.006631303 | 7 |                                              |
| CD8B         | -0.140869565 | 0     | 0.07  | 5.47E-07    | 7 |                                              |
| VPS13D       | -0.142608696 | 0     | 0.083 | 2.64E-08    | 7 |                                              |

|              |              |       |       |             |   |                              |
|--------------|--------------|-------|-------|-------------|---|------------------------------|
| RP11-356I2.4 | -0.146086957 | 0     | 0.078 | 2.78E-07    | 7 |                              |
| CEP78        | -0.15826087  | 0     | 0.08  | 4.63E-07    | 7 |                              |
| FAM101B      | -0.166956522 | 0     | 0.083 | 0.000696751 | 7 | Shared with clusters 2 and 7 |
| TET2         | -0.170434783 | 0     | 0.083 | 7.43E-05    | 7 |                              |
| MTMR4        | -0.172173913 | 0     | 0.099 | 2.38E-09    | 7 |                              |
| ITGA5        | -0.175652174 | 0     | 0.085 | 0.000327337 | 7 |                              |
| TNRC6C       | -0.253175231 | 0.03  | 0.155 | 0.000845618 | 7 |                              |
| GLIPR2       | -0.265349144 | 0.03  | 0.146 | 6.06E-07    | 7 |                              |
| UBE2E3       | -0.269565217 | 0     | 0.144 | 2.34E-15    | 7 |                              |
| CTSW         | -0.365480896 | 0.03  | 0.193 | 0.006837956 | 7 |                              |
| BZW1         | -0.520737813 | 0.909 | 0.906 | 0.000361489 | 7 | Shared with clusters 0 and 7 |
| TSHZ3        | -0.139240506 | 0     | 0.139 | 8.30E-05    | 8 |                              |

**Footnotes:**

1- Value refers to average differential expression within one subset of scaled pearsons residuals. Positive values represent increased gene expression in HIV+ cells from that cluster. Negative values represent increased gene expression in HIVexp cells from that cluster.

2- Percentage of cells, within the cluster ID for which the gene is a marker, that detect the gene

3- Percentage of all the other cells, excluding the cluster ID for which the gene is a marker, that detect the gene
