# Supplementary material for: Interactions of Monocytes, HIV, and ART Identified by an Innovative scRNAseq Pipeline: Pathways to Reservoirs and HIV-Associated Comorbidities
Source: PubMed Central journal article supplement (PMC7387797; doi:10.1128/mbio.01037-20), 2020-07-28
Supplement: mBio.01037-20-st003.pdf [file mBio.01037-20-st003.pdf]

**Supplementary Table 3:** List of differentially expressed genes modulated by ART in HIV<sup>+</sup> mature monocytes from the integrated dataset of HIV-infected mature monocytes with and without ART-treatment (HIV<sup>+</sup> with ART-treatment vs HIV<sup>+</sup> without ART-treatment).

| Gene.ID  | Avg. Diff. <sup>1</sup> | Pct.1 <sup>2</sup> | Pct.2 <sup>3</sup> | P.Value.Adj |
|----------|-------------------------|--------------------|--------------------|-------------|
| CYP1B1   | -3.701367211            | 0.138              | 0.745              | 4.40E-07    |
| MARCO    | -2.331578947            | 0                  | 0.527              | 4.68E-10    |
| GLRX     | -1.159806413            | 0.069              | 0.626              | 0.000369143 |
| MSN      | -1.089376891            | 0.034              | 0.589              | 0.003408079 |
| PTAFR    | -0.885517241            | 0.034              | 0.532              | 0.001713199 |
| CEP350   | -0.801403509            | 0                  | 0.51               | 3.14E-18    |
| SLC6A8   | -0.641052632            | 0                  | 0.187              | 4.87E-06    |
| CYCS     | -0.637894737            | 0                  | 0.328              | 3.38E-27    |
| CERK     | -0.634736842            | 0                  | 0.426              | 1.74E-13    |
| SERTAD2  | -0.601403509            | 0                  | 0.419              | 2.19E-30    |
| NF1      | -0.586315789            | 0                  | 0.391              | 1.25E-19    |
| NFIL3    | -0.570526316            | 0                  | 0.389              | 2.71E-12    |
| FAM118A  | -0.555789474            | 0                  | 0.332              | 0.000255318 |
| MSR1     | -0.527332123            | 0.138              | 0.334              | 0.009137933 |
| TRIP11   | -0.523859649            | 0                  | 0.36               | 1.06E-18    |
| KPNA4    | -0.492631579            | 0                  | 0.366              | 6.81E-28    |
| HMGXB4   | -0.48245614             | 0                  | 0.377              | 1.87E-21    |
| PRPF6    | -0.474736842            | 0                  | 0.36               | 4.49E-05    |
| USP7     | -0.46877193             | 0                  | 0.358              | 1.49E-19    |
| SMEK2    | -0.458947368            | 0                  | 0.356              | 1.09E-23    |
| KIAA1147 | -0.458245614            | 0                  | 0.29               | 5.38E-09    |
| EPRS     | -0.457192982            | 0                  | 0.341              | 1.95E-18    |
| SLK      | -0.430175439            | 0                  | 0.334              | 7.86E-18    |
| ARRDC4   | -0.423762855            | 0.034              | 0.336              | 0.009569416 |
| ATXN7    | -0.407719298            | 0                  | 0.293              | 6.72E-18    |
| PRAM1    | -0.402105263            | 0                  | 0.306              | 7.65E-17    |
| PIK3R1   | -0.402105263            | 0                  | 0.295              | 8.78E-15    |
| ITPRIPL2 | -0.401403509            | 0                  | 0.284              | 9.92E-13    |
| BCAS2    | -0.401403509            | 0                  | 0.329              | 0.004844279 |
| SETD2    | -0.392631579            | 0                  | 0.299              | 3.28E-10    |
| TRIM8    | -0.384912281            | 0                  | 0.311              | 1.83E-16    |
| POGZ     | -0.377192982            | 0                  | 0.285              | 5.28E-15    |
| KLF3     | -0.373684211            | 0                  | 0.283              | 6.92E-22    |
| SIK3     | -0.366666667            | 0                  | 0.296              | 3.41E-12    |
| SLFN5    | -0.363508772            | 0                  | 0.266              | 5.26E-16    |
| SCG5     | -0.360701754            | 0                  | 0.086              | 2.19E-08    |
| MOB1B    | -0.358947368            | 0                  | 0.283              | 3.12E-17    |
| RLIM     | -0.352982456            | 0                  | 0.286              | 1.38E-21    |
| CSNK1G2  | -0.350526316            | 0                  | 0.283              | 3.13E-08    |
| LILRB2   | -0.348421053            | 0                  | 0.247              | 3.09E-09    |
| GSR      | -0.347719298            | 0                  | 0.255              | 1.81E-09    |
| DAPK1    | -0.345263158            | 0                  | 0.279              | 5.41E-12    |
| FLNB     | -0.343508772            | 0                  | 0.265              | 4.48E-08    |
| NIN      | -0.339298246            | 0                  | 0.257              | 1.19E-18    |
| HDGFRP2  | -0.33754386             | 0                  | 0.279              | 1.03E-17    |

|          |              |       |       |             |
|----------|--------------|-------|-------|-------------|
| LPAR2    | -0.33754386  | 0     | 0.268 | 2.40E-05    |
| BAZ1B    | -0.337192982 | 0     | 0.267 | 2.85E-17    |
| DNAJB1   | -0.333938294 | 0.034 | 0.275 | 3.51E-08    |
| AFMID    | -0.332982456 | 0     | 0.265 | 4.40E-23    |
| SPATA13  | -0.327368421 | 0     | 0.242 | 3.59E-16    |
| KIAA1598 | -0.326315789 | 0     | 0.245 | 1.38E-21    |
| ZNF37A   | -0.326315789 | 0     | 0.241 | 5.91E-09    |
| SHPRH    | -0.323859649 | 0     | 0.242 | 2.62E-15    |
| LRCH3    | -0.320350877 | 0     | 0.251 | 1.37E-15    |
| ABCE1    | -0.315789474 | 0     | 0.249 | 7.44E-16    |
| TRAPPC11 | -0.315438596 | 0     | 0.253 | 3.90E-17    |
| ZMYM6    | -0.315087719 | 0     | 0.247 | 1.51E-14    |
| ODC1     | -0.315087719 | 0     | 0.229 | 8.88E-09    |
| CEP152   | -0.313333333 | 0     | 0.245 | 1.60E-19    |
| PDCD7    | -0.311929825 | 0     | 0.249 | 3.04E-13    |
| DENND1B  | -0.307719298 | 0     | 0.235 | 2.58E-13    |
| MTURN    | -0.306666667 | 0     | 0.242 | 9.96E-16    |
| APAF1    | -0.306315789 | 0     | 0.247 | 1.08E-19    |
| EBP      | -0.304561404 | 0     | 0.225 | 4.93E-25    |
| PPP2R5E  | -0.303859649 | 0     | 0.245 | 1.19E-18    |
| RASSF5   | -0.303157895 | 0     | 0.247 | 5.90E-10    |
| PIK3CA   | -0.301403509 | 0     | 0.247 | 1.95E-16    |
| P4HTM    | -0.298245614 | 0     | 0.253 | 3.59E-20    |
| STAG1    | -0.296140351 | 0     | 0.235 | 1.23E-18    |
| SIPA1L1  | -0.292631579 | 0     | 0.21  | 7.79E-11    |
| LRRK2    | -0.292631579 | 0     | 0.208 | 0.005878492 |
| EPB41L2  | -0.290877193 | 0     | 0.197 | 1.30E-15    |
| PLXNC1   | -0.287017544 | 0     | 0.218 | 2.79E-23    |
| CYHR1    | -0.287017544 | 0     | 0.239 | 5.62E-12    |
| SAMD9    | -0.284561404 | 0     | 0.218 | 1.40E-18    |
| SH3TC1   | -0.284561404 | 0     | 0.24  | 1.22E-13    |
| CLPTM1L  | -0.283859649 | 0     | 0.245 | 3.23E-18    |
| CLCN7    | -0.283157895 | 0     | 0.228 | 1.17E-07    |
| PPID     | -0.278947368 | 0     | 0.241 | 2.17E-20    |
| AHCTF1   | -0.278947368 | 0     | 0.229 | 7.79E-09    |
| PFKFB4   | -0.278947368 | 0     | 0.219 | 9.21E-09    |
| PITPNB   | -0.277894737 | 0     | 0.228 | 2.07E-23    |
| RABGAP1  | -0.276842105 | 0     | 0.234 | 1.19E-14    |
| ACSL3    | -0.276491228 | 0     | 0.219 | 8.70E-16    |
| ATP11A   | -0.275087719 | 0     | 0.233 | 5.46E-09    |
| CCND2    | -0.270877193 | 0     | 0.179 | 3.56E-13    |
| NSF      | -0.270526316 | 0     | 0.227 | 3.66E-23    |
| TGM2     | -0.268070175 | 0     | 0.144 | 1.79E-10    |
| FAM76B   | -0.267017544 | 0     | 0.224 | 3.20E-26    |
| VOPP1    | -0.267017544 | 0     | 0.225 | 2.88E-25    |
| INO80D   | -0.265614035 | 0     | 0.217 | 1.55E-14    |
| MCM3AP   | -0.264912281 | 0     | 0.223 | 1.60E-14    |
| USF1     | -0.264561404 | 0     | 0.224 | 2.78E-11    |
| ING1     | -0.263859649 | 0     | 0.221 | 1.98E-19    |
| PRKDC    | -0.263508772 | 0     | 0.207 | 2.28E-11    |
| DIAPH1   | -0.258596491 | 0     | 0.208 | 6.92E-07    |
| DSTYK    | -0.256842105 | 0     | 0.211 | 7.55E-15    |

|            |               |   |       |             |
|------------|---------------|---|-------|-------------|
| ZMYM4      | -0.256491228  | 0 | 0.209 | 1.98E-10    |
| CTCF       | -0.256491228  | 0 | 0.216 | 9.03E-08    |
| AGPAT3     | -0.255789474  | 0 | 0.218 | 1.83E-16    |
| DIDO1      | -0.2533333333 | 0 | 0.213 | 2.17E-11    |
| QSER1      | -0.252982456  | 0 | 0.201 | 0.000208274 |
| FBXW11     | -0.251929825  | 0 | 0.222 | 4.55E-22    |
| CLEC12A    | -0.251929825  | 0 | 0.171 | 2.42E-08    |
| UBE2S      | -0.250877193  | 0 | 0.172 | 0.005695106 |
| PACS1      | -0.250526316  | 0 | 0.216 | 1.38E-15    |
| NRIP1      | -0.250526316  | 0 | 0.209 | 1.79E-11    |
| MAP3K7     | -0.248070175  | 0 | 0.207 | 1.04E-18    |
| GSE1       | -0.247017544  | 0 | 0.206 | 1.05E-19    |
| LZTS2      | -0.245964912  | 0 | 0.213 | 1.50E-10    |
| MTMR6      | -0.245614035  | 0 | 0.21  | 1.05E-19    |
| TP53BP2    | -0.245614035  | 0 | 0.21  | 2.52E-14    |
| MAN2A2     | -0.245614035  | 0 | 0.207 | 1.75E-12    |
| CTR9       | -0.244912281  | 0 | 0.208 | 1.74E-23    |
| TMEM87B    | -0.243508772  | 0 | 0.206 | 1.12E-08    |
| HDAC4      | -0.241052632  | 0 | 0.203 | 0.002681373 |
| UBE2E3     | -0.240701754  | 0 | 0.2   | 6.79E-16    |
| FBXO33     | -0.240350877  | 0 | 0.202 | 7.17E-13    |
| KDM1A      | -0.239298246  | 0 | 0.208 | 2.49E-16    |
| D2HGDH     | -0.236140351  | 0 | 0.193 | 6.57E-30    |
| NPIP5      | -0.234035088  | 0 | 0.194 | 1.34E-08    |
| DOPEY2     | -0.232280702  | 0 | 0.185 | 7.68E-14    |
| XPO6       | -0.230877193  | 0 | 0.2   | 9.42E-12    |
| PLEKHM1    | -0.230526316  | 0 | 0.195 | 1.57E-16    |
| RP11-169K1 | -0.229824561  | 0 | 0.184 | 4.36E-10    |
| RUFY2      | -0.229473684  | 0 | 0.192 | 3.00E-16    |
| COG4       | -0.22877193   | 0 | 0.202 | 1.68E-18    |
| TNFRSF10B  | -0.228070175  | 0 | 0.196 | 1.58E-08    |
| ALOX15B    | -0.227368421  | 0 | 0.173 | 4.08E-16    |
| MGA        | -0.227017544  | 0 | 0.188 | 1.71E-08    |
| BOLA3      | -0.225263158  | 0 | 0.159 | 1.25E-19    |
| IFIH1      | -0.224912281  | 0 | 0.187 | 4.15E-10    |
| MRPS31     | -0.224561404  | 0 | 0.187 | 4.72E-08    |
| ACVR2B     | -0.224561404  | 0 | 0.186 | 0.000602084 |
| RNF216     | -0.224210526  | 0 | 0.191 | 1.39E-12    |
| WBSCR22    | -0.223859649  | 0 | 0.199 | 1.05E-17    |
| ZNF770     | -0.223859649  | 0 | 0.189 | 1.06E-08    |
| FMR1       | -0.22245614   | 0 | 0.198 | 1.45E-14    |
| ZMAT1      | -0.22245614   | 0 | 0.166 | 8.09E-10    |
| WDSUB1     | -0.22         | 0 | 0.196 | 1.24E-21    |
| FAM73A     | -0.218947368  | 0 | 0.188 | 2.04E-18    |
| ARRDC1     | -0.218947368  | 0 | 0.193 | 5.24E-13    |
| IGF1R      | -0.218596491  | 0 | 0.186 | 0.000190353 |
| SLC41A2    | -0.218245614  | 0 | 0.174 | 1.64E-25    |
| DOCK11     | -0.217894737  | 0 | 0.187 | 6.13E-21    |
| FCHSD2     | -0.217894737  | 0 | 0.187 | 4.13E-14    |
| LINC-PINT  | -0.217192982  | 0 | 0.178 | 4.42E-28    |
| ZNF350     | -0.216842105  | 0 | 0.195 | 2.65E-27    |
| DGKH       | -0.215438596  | 0 | 0.161 | 3.33E-10    |

|            |              |   |       |             |
|------------|--------------|---|-------|-------------|
| RPP14      | -0.214736842 | 0 | 0.184 | 3.43E-12    |
| MADD       | -0.213684211 | 0 | 0.182 | 6.07E-12    |
| RPS6KB1    | -0.213684211 | 0 | 0.185 | 4.13E-07    |
| CCDC71L    | -0.211929825 | 0 | 0.18  | 0.001171381 |
| GOLGA8A    | -0.210175439 | 0 | 0.167 | 0.000239349 |
| SMARCA4    | -0.208421053 | 0 | 0.173 | 1.75E-16    |
| ERO1LB     | -0.207719298 | 0 | 0.171 | 6.93E-18    |
| WDR91      | -0.207719298 | 0 | 0.18  | 1.06E-10    |
| SCAPER     | -0.207368421 | 0 | 0.175 | 2.41E-07    |
| RMND5A     | -0.206666667 | 0 | 0.184 | 1.15E-26    |
| MARK2      | -0.205614035 | 0 | 0.187 | 4.11E-09    |
| RPRD1B     | -0.205263158 | 0 | 0.182 | 4.82E-19    |
| ATAD2      | -0.203508772 | 0 | 0.162 | 1.76E-08    |
| UBE2G2     | -0.202807018 | 0 | 0.168 | 9.36E-07    |
| DHX38      | -0.20245614  | 0 | 0.176 | 1.45E-12    |
| IGF2BP2    | -0.202105263 | 0 | 0.172 | 2.49E-12    |
| DHX32      | -0.202105263 | 0 | 0.175 | 9.45E-12    |
| ZNF141     | -0.202105263 | 0 | 0.17  | 5.73E-05    |
| ZNF226     | -0.201052632 | 0 | 0.178 | 6.91E-21    |
| NCOA2      | -0.201052632 | 0 | 0.169 | 1.44E-09    |
| SLC7A8     | -0.200701754 | 0 | 0.148 | 4.09E-10    |
| MEF2C      | -0.198947368 | 0 | 0.155 | 1.82E-09    |
| GCNT2      | -0.198245614 | 0 | 0.166 | 3.94E-17    |
| RBM10      | -0.197192982 | 0 | 0.172 | 8.40E-14    |
| RTN4RL2    | -0.197192982 | 0 | 0.133 | 4.87E-06    |
| TK1        | -0.196842105 | 0 | 0.153 | 1.18E-12    |
| ZNF219     | -0.196842105 | 0 | 0.176 | 2.12E-06    |
| CRTC3      | -0.196491228 | 0 | 0.171 | 3.57E-12    |
| YARS       | -0.196140351 | 0 | 0.171 | 3.12E-21    |
| UBE3C      | -0.195789474 | 0 | 0.171 | 6.33E-10    |
| CHSY1      | -0.195438596 | 0 | 0.164 | 2.69E-07    |
| NBAS       | -0.195438596 | 0 | 0.169 | 6.89E-07    |
| EED        | -0.194385965 | 0 | 0.173 | 6.21E-15    |
| DCLRE1B    | -0.194035088 | 0 | 0.169 | 8.29E-17    |
| SPECC1     | -0.194035088 | 0 | 0.158 | 1.49E-06    |
| NOB1       | -0.193684211 | 0 | 0.171 | 1.95E-14    |
| IPO9       | -0.193333333 | 0 | 0.166 | 7.02E-09    |
| RFX3       | -0.191578947 | 0 | 0.158 | 9.44E-05    |
| STK40      | -0.190877193 | 0 | 0.164 | 3.81E-11    |
| ZNF318     | -0.189824561 | 0 | 0.162 | 5.91E-10    |
| PHF6       | -0.189122807 | 0 | 0.168 | 3.99E-12    |
| PRKRIR     | -0.18877193  | 0 | 0.162 | 7.88E-19    |
| ATMIN      | -0.18877193  | 0 | 0.172 | 1.82E-11    |
| AC084018.1 | -0.188070175 | 0 | 0.162 | 9.14E-16    |
| ORAI2      | -0.188070175 | 0 | 0.151 | 8.76E-13    |
| R3HCC1L    | -0.188070175 | 0 | 0.164 | 2.68E-12    |
| STRN4      | -0.187368421 | 0 | 0.167 | 1.05E-07    |
| PPM1F      | -0.186666667 | 0 | 0.157 | 3.14E-06    |
| BMPR2      | -0.186315789 | 0 | 0.162 | 2.95E-12    |
| NEDD4L     | -0.185964912 | 0 | 0.16  | 1.78E-11    |
| MGAT5      | -0.185964912 | 0 | 0.158 | 3.79E-05    |
| TBC1D12    | -0.185614035 | 0 | 0.161 | 1.64E-19    |

|           |              |   |       |             |
|-----------|--------------|---|-------|-------------|
| PIP4K2B   | -0.185614035 | 0 | 0.162 | 0.00112219  |
| SNX29P2   | -0.185263158 | 0 | 0.152 | 3.20E-12    |
| FOXJ2     | -0.185263158 | 0 | 0.165 | 5.81E-09    |
| GDAP2     | -0.185263158 | 0 | 0.163 | 1.53E-07    |
| COG7      | -0.184912281 | 0 | 0.16  | 3.37E-12    |
| AQR       | -0.184210526 | 0 | 0.162 | 7.07E-19    |
| SNX20     | -0.184210526 | 0 | 0.161 | 1.02E-06    |
| C4orf29   | -0.183859649 | 0 | 0.16  | 6.14E-18    |
| TTBK2     | -0.183508772 | 0 | 0.15  | 1.78E-13    |
| CD99L2    | -0.182105263 | 0 | 0.157 | 2.74E-09    |
| TES       | -0.181403509 | 0 | 0.155 | 4.38E-13    |
| KIAA1731  | -0.180350877 | 0 | 0.154 | 4.68E-06    |
| EIF3J-AS1 | -0.179298246 | 0 | 0.147 | 2.12E-13    |
| WHSC1     | -0.178947368 | 0 | 0.152 | 2.75E-08    |
| RNASEL    | -0.178596491 | 0 | 0.158 | 5.28E-11    |
| TAB3      | -0.178245614 | 0 | 0.15  | 2.04E-06    |
| GPR160    | -0.178245614 | 0 | 0.151 | 8.26E-05    |
| WDR48     | -0.176842105 | 0 | 0.159 | 5.16E-10    |
| HIC2      | -0.176140351 | 0 | 0.155 | 8.49E-07    |
| WDTC1     | -0.175438596 | 0 | 0.154 | 2.94E-09    |
| SMAD7     | -0.175438596 | 0 | 0.158 | 8.55E-05    |
| ARFIP1    | -0.175087719 | 0 | 0.159 | 6.67E-09    |
| NAE1      | -0.174385965 | 0 | 0.157 | 7.15E-16    |
| USP24     | -0.173684211 | 0 | 0.156 | 1.83E-07    |
| ARHGAP19  | -0.173684211 | 0 | 0.159 | 8.81E-05    |
| ZNF33A    | -0.173684211 | 0 | 0.148 | 0.003063948 |
| CSE1L     | -0.17122807  | 0 | 0.152 | 7.09E-14    |
| ENTPD4    | -0.170877193 | 0 | 0.147 | 7.26E-12    |
| ZNF263    | -0.170526316 | 0 | 0.153 | 2.78E-10    |
| DLG1      | -0.170175439 | 0 | 0.144 | 2.05E-12    |
| NUDT5     | -0.168421053 | 0 | 0.147 | 1.07E-07    |
| ZNF736    | -0.167719298 | 0 | 0.145 | 2.42E-07    |
| THAP6     | -0.166666667 | 0 | 0.146 | 1.23E-11    |
| ZMYND15   | -0.166315789 | 0 | 0.141 | 7.31E-14    |
| MX2       | -0.165964912 | 0 | 0.139 | 2.68E-11    |
| FAM120B   | -0.165614035 | 0 | 0.149 | 1.47E-09    |
| PPP1R3B   | -0.164912281 | 0 | 0.148 | 1.21E-11    |
| ELF4      | -0.163859649 | 0 | 0.148 | 2.99E-09    |
| ZNF493    | -0.163859649 | 0 | 0.142 | 4.75E-07    |
| TXLNG     | -0.162807018 | 0 | 0.143 | 4.16E-12    |
| LAMC1     | -0.162807018 | 0 | 0.14  | 6.28E-12    |
| THAP5     | -0.162105263 | 0 | 0.151 | 2.82E-13    |
| HMGXB3    | -0.162105263 | 0 | 0.144 | 5.61E-11    |
| MAML1     | -0.161403509 | 0 | 0.147 | 3.21E-11    |
| SRFBP1    | -0.161403509 | 0 | 0.145 | 2.74E-07    |
| TFIP11    | -0.161052632 | 0 | 0.149 | 5.18E-15    |
| TEN1      | -0.160701754 | 0 | 0.15  | 1.46E-23    |
| NFATC1    | -0.160701754 | 0 | 0.146 | 6.24E-12    |
| ARFGAP1   | -0.160350877 | 0 | 0.142 | 7.90E-15    |
| TWISTNB   | -0.160350877 | 0 | 0.139 | 3.00E-11    |
| PLA2G4A   | -0.160350877 | 0 | 0.138 | 7.68E-10    |
| AGL       | -0.160350877 | 0 | 0.144 | 3.34E-09    |

|           |              |   |       |             |
|-----------|--------------|---|-------|-------------|
| SLC36A1   | -0.16        | 0 | 0.135 | 3.25E-06    |
| FAM8A1    | -0.159298246 | 0 | 0.144 | 3.78E-10    |
| LSM14B    | -0.159298246 | 0 | 0.149 | 2.23E-06    |
| PLAGL1    | -0.158947368 | 0 | 0.134 | 5.12E-16    |
| THUMPD2   | -0.158245614 | 0 | 0.135 | 5.56E-11    |
| HMGCS1    | -0.157192982 | 0 | 0.136 | 5.12E-12    |
| PLCB3     | -0.156140351 | 0 | 0.142 | 4.11E-12    |
| PPP1R3E   | -0.155789474 | 0 | 0.123 | 6.14E-12    |
| MPND      | -0.155087719 | 0 | 0.141 | 3.14E-11    |
| AP5B1     | -0.155087719 | 0 | 0.132 | 2.71E-10    |
| ADAMTS10  | -0.154736842 | 0 | 0.134 | 0.000900268 |
| ZCCHC14   | -0.153684211 | 0 | 0.135 | 4.18E-05    |
| CAMKK2    | -0.152631579 | 0 | 0.135 | 1.27E-08    |
| ZNF100    | -0.152280702 | 0 | 0.136 | 5.19E-10    |
| VKORC1L1  | -0.151578947 | 0 | 0.134 | 2.53E-14    |
| SYNE1     | -0.15122807  | 0 | 0.136 | 8.89E-16    |
| ZNF844    | -0.15122807  | 0 | 0.134 | 2.19E-09    |
| SNX33     | -0.15122807  | 0 | 0.134 | 4.54E-07    |
| PPP1R12C  | -0.150877193 | 0 | 0.135 | 7.71E-10    |
| HERC3     | -0.150175439 | 0 | 0.13  | 8.35E-16    |
| PEX26     | -0.150175439 | 0 | 0.127 | 1.50E-05    |
| MARVELD1  | -0.150175439 | 0 | 0.135 | 0.000356082 |
| ZNF768    | -0.149824561 | 0 | 0.139 | 4.81E-07    |
| FKBP5     | -0.149122807 | 0 | 0.13  | 0.001047787 |
| REXO4     | -0.148070175 | 0 | 0.132 | 1.17E-12    |
| FAM160B1  | -0.147719298 | 0 | 0.135 | 1.13E-12    |
| GTPBP2    | -0.147368421 | 0 | 0.128 | 5.11E-12    |
| METTL4    | -0.146315789 | 0 | 0.129 | 1.01E-20    |
| MUT       | -0.145964912 | 0 | 0.134 | 5.10E-12    |
| C10orf118 | -0.145263158 | 0 | 0.123 | 5.09E-10    |
| TMEM180   | -0.144912281 | 0 | 0.129 | 1.14E-09    |
| EML2      | -0.144912281 | 0 | 0.128 | 0.00066856  |
| HINFP     | -0.144561404 | 0 | 0.13  | 6.13E-13    |
| P4HA2     | -0.144561404 | 0 | 0.125 | 1.31E-09    |
| NMB       | -0.143859649 | 0 | 0.112 | 1.03E-13    |
| VAV2      | -0.143859649 | 0 | 0.127 | 1.71E-08    |
| E2F3      | -0.143859649 | 0 | 0.132 | 4.14E-08    |
| UQCC2     | -0.142807018 | 0 | 0.112 | 1.63E-06    |
| PIAS4     | -0.14245614  | 0 | 0.131 | 6.26E-08    |
| ZBTB40    | -0.141754386 | 0 | 0.124 | 0.004440554 |
| GLB1L     | -0.141754386 | 0 | 0.12  | 0.005597023 |
| TMEM120B  | -0.141403509 | 0 | 0.125 | 4.15E-10    |
| EFTUD1    | -0.141403509 | 0 | 0.132 | 4.09E-07    |
| C9orf69   | -0.140701754 | 0 | 0.131 | 1.67E-06    |
| PDPR      | -0.140701754 | 0 | 0.128 | 0.001285487 |
| WWC2      | -0.140701754 | 0 | 0.116 | 0.005856273 |
| ZNF714    | -0.140350877 | 0 | 0.121 | 4.30E-08    |
| BAG3      | -0.14        | 0 | 0.13  | 8.15E-12    |
| CCDC57    | -0.14        | 0 | 0.124 | 2.25E-08    |
| TXLNA     | -0.139649123 | 0 | 0.128 | 7.45E-11    |
| ATAD2B    | -0.139298246 | 0 | 0.122 | 9.85E-05    |
| TMEM144   | -0.138947368 | 0 | 0.119 | 2.73E-10    |

|            |              |   |       |             |
|------------|--------------|---|-------|-------------|
| TMEM57     | -0.138596491 | 0 | 0.127 | 3.57E-09    |
| ZNF333     | -0.137894737 | 0 | 0.124 | 0.000574995 |
| ZNF44      | -0.13754386  | 0 | 0.124 | 1.01E-10    |
| WDR73      | -0.13754386  | 0 | 0.118 | 6.09E-08    |
| DVL1       | -0.13754386  | 0 | 0.125 | 2.07E-06    |
| PITRM1     | -0.13754386  | 0 | 0.125 | 1.63E-05    |
| EPAS1      | -0.136491228 | 0 | 0.117 | 1.67E-09    |
| MLH1       | -0.136491228 | 0 | 0.127 | 2.45E-08    |
| TSR1       | -0.136491228 | 0 | 0.126 | 4.37E-08    |
| ZNF639     | -0.136491228 | 0 | 0.124 | 8.12E-07    |
| MKL2       | -0.136491228 | 0 | 0.123 | 0.001454474 |
| IRGQ       | -0.136140351 | 0 | 0.117 | 4.48E-05    |
| TAPT1      | -0.136140351 | 0 | 0.125 | 0.000228772 |
| TRIM41     | -0.135789474 | 0 | 0.123 | 3.12E-09    |
| NSUN5      | -0.135438596 | 0 | 0.123 | 8.02E-12    |
| SUPV3L1    | -0.135438596 | 0 | 0.122 | 9.00E-08    |
| LEMD3      | -0.135438596 | 0 | 0.125 | 0.000200042 |
| FGFR1      | -0.135087719 | 0 | 0.114 | 1.58E-09    |
| AP001055.6 | -0.135087719 | 0 | 0.118 | 0.001383413 |
| GBP3       | -0.134736842 | 0 | 0.122 | 0.00018594  |
| UHRF1BP1   | -0.134035088 | 0 | 0.122 | 3.75E-11    |
| OXSM       | -0.134035088 | 0 | 0.122 | 1.45E-06    |
| CCDC77     | -0.132631579 | 0 | 0.121 | 6.00E-11    |
| SMARCD3    | -0.132631579 | 0 | 0.113 | 6.85E-08    |
| PTGES2     | -0.132280702 | 0 | 0.123 | 6.40E-08    |
| DKFZP761J  | -0.131929825 | 0 | 0.122 | 1.97E-09    |
| MTAP       | -0.131929825 | 0 | 0.123 | 3.95E-07    |
| PPP1R12B   | -0.131929825 | 0 | 0.118 | 2.66E-06    |
| ECHDC3     | -0.131578947 | 0 | 0.126 | 3.69E-19    |
| LINC01010  | -0.131578947 | 0 | 0.109 | 4.75E-16    |
| TMEM168    | -0.131578947 | 0 | 0.118 | 2.38E-10    |
| METTL1     | -0.13122807  | 0 | 0.095 | 2.71E-11    |
| TXNRD2     | -0.13122807  | 0 | 0.121 | 3.54E-07    |
| TAF13      | -0.130877193 | 0 | 0.121 | 3.45E-16    |
| PSPC1      | -0.130877193 | 0 | 0.12  | 3.02E-12    |
| B3GNT5     | -0.130526316 | 0 | 0.115 | 2.60E-17    |
| XPNPEP3    | -0.130175439 | 0 | 0.117 | 2.41E-09    |
| NUP188     | -0.129473684 | 0 | 0.121 | 2.61E-06    |
| TJAP1      | -0.129122807 | 0 | 0.116 | 2.35E-09    |
| PIP5K1C    | -0.128421053 | 0 | 0.116 | 5.10E-06    |
| PKNOX1     | -0.128070175 | 0 | 0.115 | 2.15E-08    |
| SYNJ2BP    | -0.127719298 | 0 | 0.119 | 3.29E-11    |
| ATP8B4     | -0.127719298 | 0 | 0.098 | 2.72E-08    |
| YTHDC2     | -0.127368421 | 0 | 0.112 | 0.000762686 |
| CCDC159    | -0.127017544 | 0 | 0.114 | 1.29E-14    |
| LIN54      | -0.127017544 | 0 | 0.118 | 2.16E-06    |
| KLF16      | -0.126315789 | 0 | 0.118 | 0.00040078  |
| NDUFAF2    | -0.125964912 | 0 | 0.115 | 7.73E-16    |
| PRKCI      | -0.125964912 | 0 | 0.113 | 4.87E-09    |
| RAB11FIP4  | -0.125964912 | 0 | 0.111 | 8.91E-09    |
| RRP36      | -0.125964912 | 0 | 0.119 | 7.14E-06    |
| SIN3B      | -0.125964912 | 0 | 0.116 | 0.004073493 |

|            |              |   |       |             |
|------------|--------------|---|-------|-------------|
| ATRN       | -0.125614035 | 0 | 0.118 | 1.78E-11    |
| ZNF579     | -0.125614035 | 0 | 0.12  | 1.42E-08    |
| RAD51C     | -0.125263158 | 0 | 0.115 | 4.03E-09    |
| ERCC6      | -0.125263158 | 0 | 0.113 | 1.75E-07    |
| MIR29A     | -0.124912281 | 0 | 0.112 | 0.001808048 |
| DTYMK      | -0.124561404 | 0 | 0.114 | 1.05E-09    |
| TAF1C      | -0.124561404 | 0 | 0.111 | 9.12E-08    |
| CXCL1      | -0.124561404 | 0 | 0.059 | 8.62E-07    |
| TNPO2      | -0.124210526 | 0 | 0.115 | 2.57E-09    |
| RMDN3      | -0.123859649 | 0 | 0.113 | 1.63E-07    |
| STAU2      | -0.123157895 | 0 | 0.112 | 5.43E-08    |
| MSI2       | -0.122807018 | 0 | 0.098 | 1.23E-08    |
| FAM217B    | -0.12245614  | 0 | 0.104 | 0.000504963 |
| LILRA5     | -0.12245614  | 0 | 0.101 | 0.00387888  |
| KIAA0020   | -0.122105263 | 0 | 0.106 | 8.79E-10    |
| CNOT11     | -0.122105263 | 0 | 0.114 | 5.62E-08    |
| MED14      | -0.122105263 | 0 | 0.115 | 8.21E-08    |
| RP11-1114A | -0.122105263 | 0 | 0.101 | 7.21E-05    |
| RGP1       | -0.121754386 | 0 | 0.112 | 1.81E-06    |
| CLOCK      | -0.121403509 | 0 | 0.106 | 2.91E-08    |
| ZFYVE26    | -0.121052632 | 0 | 0.112 | 0.002216974 |
| AGPAT9     | -0.120701754 | 0 | 0.092 | 6.00E-09    |
| TTLL5      | -0.120701754 | 0 | 0.11  | 1.49E-07    |
| ZNF121     | -0.120701754 | 0 | 0.112 | 3.58E-05    |
| TFDP2      | -0.119649123 | 0 | 0.106 | 1.09E-11    |
| ARID3B     | -0.119649123 | 0 | 0.106 | 0.000229547 |
| RPAP2      | -0.119649123 | 0 | 0.102 | 0.000389312 |
| PRC1       | -0.119298246 | 0 | 0.095 | 0.000115372 |
| KAT2B      | -0.118947368 | 0 | 0.108 | 7.61E-09    |
| INTS2      | -0.118947368 | 0 | 0.108 | 1.22E-05    |
| FER        | -0.118947368 | 0 | 0.102 | 0.009203334 |
| FAM98B     | -0.118596491 | 0 | 0.105 | 9.90E-14    |
| SAMD9L     | -0.118596491 | 0 | 0.106 | 3.69E-13    |
| TBL2       | -0.118596491 | 0 | 0.11  | 1.30E-11    |
| GCN1L1     | -0.118596491 | 0 | 0.112 | 0.002487381 |
| HCG11      | -0.118245614 | 0 | 0.111 | 1.25E-13    |
| CCDC30     | -0.118245614 | 0 | 0.096 | 6.90E-09    |
| SCAI       | -0.118245614 | 0 | 0.101 | 8.18E-09    |
| EID3       | -0.117894737 | 0 | 0.094 | 3.63E-14    |
| MMS19      | -0.117894737 | 0 | 0.11  | 2.48E-05    |
| ZKSCAN8    | -0.117192982 | 0 | 0.107 | 4.19E-08    |
| SLC30A6    | -0.117192982 | 0 | 0.106 | 5.18E-07    |
| TMEM199    | -0.116842105 | 0 | 0.107 | 1.61E-11    |
| XRRA1      | -0.116842105 | 0 | 0.109 | 1.85E-11    |
| ZSCAN30    | -0.116842105 | 0 | 0.101 | 0.000176314 |
| ZCCHC3     | -0.116842105 | 0 | 0.105 | 0.000543525 |
| MIR181A1HG | -0.116491228 | 0 | 0.105 | 6.36E-11    |
| RP11-383J2 | -0.116491228 | 0 | 0.105 | 3.08E-07    |
| ADA        | -0.116491228 | 0 | 0.106 | 1.19E-06    |
| RP11-611L7 | -0.116491228 | 0 | 0.108 | 0.000155005 |
| HIVEP2     | -0.115087719 | 0 | 0.098 | 0.00088015  |
| GGH        | -0.114736842 | 0 | 0.093 | 6.91E-18    |



|            |              |   |       |             |
|------------|--------------|---|-------|-------------|
| TFB1M      | -0.114736842 | 0 | 0.105 | 6.03E-12    |
| SPICE1     | -0.114736842 | 0 | 0.105 | 1.62E-05    |
| PPP1R13L   | -0.114385965 | 0 | 0.103 | 7.84E-12    |
| SERPINB8   | -0.114385965 | 0 | 0.105 | 8.55E-05    |
| ANKRD40    | -0.114035088 | 0 | 0.108 | 3.57E-12    |
| TUBD1      | -0.114035088 | 0 | 0.104 | 5.14E-09    |
| WDR47      | -0.112982456 | 0 | 0.104 | 1.07E-15    |
| RUFY3      | -0.112982456 | 0 | 0.098 | 1.79E-11    |
| PREB       | -0.112982456 | 0 | 0.104 | 2.65E-10    |
| R3HDM1     | -0.112631579 | 0 | 0.101 | 3.24E-08    |
| USP19      | -0.112631579 | 0 | 0.106 | 8.91E-05    |
| BARD1      | -0.112280702 | 0 | 0.099 | 0.002226082 |
| FAM53B     | -0.112280702 | 0 | 0.1   | 0.004257061 |
| MAP4K4     | -0.111929825 | 0 | 0.098 | 0.007917857 |
| CARM1      | -0.110877193 | 0 | 0.105 | 6.15E-06    |
| MAPK8      | -0.110526316 | 0 | 0.103 | 2.98E-12    |
| TRPM4      | -0.110175439 | 0 | 0.099 | 1.13E-07    |
| RANGRF     | -0.109824561 | 0 | 0.104 | 2.82E-13    |
| MIS18A     | -0.109824561 | 0 | 0.103 | 3.26E-09    |
| RP11-1407C | -0.109473684 | 0 | 0.098 | 5.64E-12    |
| HECTD3     | -0.109473684 | 0 | 0.101 | 5.04E-08    |
| PDE12      | -0.109473684 | 0 | 0.1   | 0.001175228 |
| TADA2B     | -0.109122807 | 0 | 0.104 | 5.88E-06    |
| STX2       | -0.109122807 | 0 | 0.095 | 5.63E-05    |
| CDIP1      | -0.10877193  | 0 | 0.103 | 5.33E-11    |
| SCIMP      | -0.108070175 | 0 | 0.098 | 0.00344579  |
| APOC2      | -0.108070175 | 0 | 0.062 | 0.004381135 |
| CDC23      | -0.107719298 | 0 | 0.102 | 1.10E-11    |
| DBF4       | -0.107719298 | 0 | 0.096 | 0.000196659 |
| OSGIN1     | -0.107719298 | 0 | 0.088 | 0.000861417 |
| RP13-582O9 | -0.107368421 | 0 | 0.098 | 8.78E-10    |
| PARP11     | -0.107017544 | 0 | 0.096 | 5.00E-08    |
| ABI2       | -0.107017544 | 0 | 0.09  | 1.09E-06    |
| FCHSD1     | -0.106666667 | 0 | 0.1   | 9.75E-05    |
| AP4M1      | -0.106315789 | 0 | 0.096 | 1.92E-12    |
| ZNF512     | -0.106315789 | 0 | 0.098 | 5.70E-08    |
| GMDS-AS1   | -0.106315789 | 0 | 0.096 | 8.72E-07    |
| PITPNM1    | -0.106315789 | 0 | 0.1   | 1.60E-05    |
| TP53BP1    | -0.106315789 | 0 | 0.095 | 0.008280647 |
| MED24      | -0.105964912 | 0 | 0.099 | 1.13E-12    |
| ELMOD3     | -0.105614035 | 0 | 0.094 | 6.93E-07    |
| ACAT1      | -0.105263158 | 0 | 0.097 | 2.32E-20    |
| ZNF529     | -0.104912281 | 0 | 0.096 | 2.16E-10    |
| NUDT16     | -0.104912281 | 0 | 0.1   | 5.08E-08    |
| TTLL12     | -0.104561404 | 0 | 0.099 | 3.13E-05    |
| KNTC1      | -0.104561404 | 0 | 0.092 | 0.008230781 |
| AC090186.1 | -0.104210526 | 0 | 0.096 | 9.54E-13    |
| CSTF1      | -0.104210526 | 0 | 0.097 | 1.09E-07    |
| RPAP3      | -0.103859649 | 0 | 0.094 | 0.00133466  |
| C6orf57    | -0.103508772 | 0 | 0.099 | 1.93E-08    |
| MB21D2     | -0.103508772 | 0 | 0.094 | 3.93E-05    |
| ZNF746     | -0.103508772 | 0 | 0.095 | 0.00825738  |

|            |              |   |       |             |
|------------|--------------|---|-------|-------------|
| RP11-804H8 | -0.103157895 | 0 | 0.093 | 3.23E-12    |
| HKR1       | -0.103157895 | 0 | 0.097 | 1.58E-06    |
| STIM2      | -0.103157895 | 0 | 0.091 | 0.003639811 |
| ATXN7L3    | -0.102807018 | 0 | 0.096 | 0.000252097 |
| ANKRD50    | -0.10245614  | 0 | 0.089 | 3.23E-07    |
| FMNL3      | -0.10245614  | 0 | 0.092 | 5.59E-05    |
| ZEB2-AS1   | -0.10245614  | 0 | 0.09  | 0.000388541 |
| TELO2      | -0.101403509 | 0 | 0.095 | 1.16E-06    |
| CTB-55O6.1 | -0.100701754 | 0 | 0.089 | 0.000352346 |
| NLN        | -0.100350877 | 0 | 0.086 | 1.41E-06    |
| LPCAT4     | -0.1         | 0 | 0.095 | 7.04E-14    |
| HS3ST1     | -0.099649123 | 0 | 0.086 | 1.44E-11    |
| HEMK1      | -0.099649123 | 0 | 0.092 | 2.17E-05    |
| MTHFD2L    | -0.099298246 | 0 | 0.091 | 1.21E-14    |
| RAB40C     | -0.099298246 | 0 | 0.089 | 2.97E-08    |
| ABCD3      | -0.098947368 | 0 | 0.092 | 7.41E-07    |
| ITFG2      | -0.098596491 | 0 | 0.089 | 5.20E-11    |
| TBP        | -0.098596491 | 0 | 0.091 | 2.82E-07    |
| TMEM102    | -0.098596491 | 0 | 0.094 | 0.000793528 |
| DNAJA3     | -0.098596491 | 0 | 0.091 | 0.001689718 |
| RAB38      | -0.098245614 | 0 | 0.093 | 3.39E-06    |
| BRCA1      | -0.098245614 | 0 | 0.081 | 4.22E-05    |
| CTDP1      | -0.097894737 | 0 | 0.091 | 0.000409752 |
| ENTPD1     | -0.097192982 | 0 | 0.084 | 7.28E-10    |
| SDR39U1    | -0.096842105 | 0 | 0.089 | 9.93E-13    |
| RP11-295P9 | -0.096842105 | 0 | 0.086 | 0.005013896 |
| IFRD2      | -0.096491228 | 0 | 0.091 | 6.37E-26    |
| SLC38A9    | -0.096491228 | 0 | 0.089 | 2.66E-10    |
| SCO1       | -0.096140351 | 0 | 0.093 | 8.38E-07    |
| PHLDB3     | -0.095789474 | 0 | 0.09  | 7.09E-14    |
| UGGT1      | -0.095789474 | 0 | 0.091 | 6.24E-12    |
| NKIRAS1    | -0.095789474 | 0 | 0.09  | 1.02E-09    |
| ACAP3      | -0.095789474 | 0 | 0.086 | 6.89E-07    |
| ZNF3       | -0.095789474 | 0 | 0.089 | 1.27E-06    |
| PTGIR      | -0.095438596 | 0 | 0.081 | 2.53E-10    |
| CCDC97     | -0.095438596 | 0 | 0.089 | 5.67E-10    |
| ZMPSTE24   | -0.095087719 | 0 | 0.087 | 5.45E-10    |
| CTA-292E10 | -0.094736842 | 0 | 0.08  | 4.39E-06    |
| CHPF2      | -0.094385965 | 0 | 0.089 | 1.92E-07    |
| TULP4      | -0.094385965 | 0 | 0.086 | 1.91E-05    |
| GTPBP3     | -0.094385965 | 0 | 0.088 | 0.006286921 |
| TTC5       | -0.093684211 | 0 | 0.089 | 0.003396233 |
| C22orf46   | -0.093333333 | 0 | 0.085 | 9.57E-06    |
| NPIPA1     | -0.092982456 | 0 | 0.084 | 8.03E-13    |
| MRPS26     | -0.092982456 | 0 | 0.085 | 4.65E-12    |
| TM4SF19    | -0.092982456 | 0 | 0.067 | 3.07E-08    |
| TEX10      | -0.092982456 | 0 | 0.086 | 1.35E-07    |
| PTPN9      | -0.092631579 | 0 | 0.088 | 1.03E-11    |
| APPL2      | -0.092631579 | 0 | 0.084 | 0.000125592 |
| NR1D1      | -0.091929825 | 0 | 0.081 | 7.79E-10    |
| HAGHL      | -0.091578947 | 0 | 0.084 | 2.42E-08    |
| MOB3C      | -0.090877193 | 0 | 0.082 | 2.18E-06    |

|            |              |   |       |             |
|------------|--------------|---|-------|-------------|
| NBPF11     | -0.090877193 | 0 | 0.081 | 0.000979838 |
| HELB       | -0.090877193 | 0 | 0.08  | 0.002880848 |
| CBWD6      | -0.090526316 | 0 | 0.081 | 2.83E-12    |
| ZNF814     | -0.090526316 | 0 | 0.083 | 1.74E-08    |
| RPPH1      | -0.090175439 | 0 | 0.063 | 0.003908061 |
| BTN2A2     | -0.090175439 | 0 | 0.082 | 0.004222116 |
| TIMM21     | -0.089473684 | 0 | 0.086 | 2.23E-07    |
| GTPBP1     | -0.089122807 | 0 | 0.082 | 4.90E-10    |
| FAM50B     | -0.089122807 | 0 | 0.084 | 2.96E-08    |
| SH2B1      | -0.089122807 | 0 | 0.08  | 7.50E-08    |
| KRBOX4     | -0.08877193  | 0 | 0.085 | 0.000112113 |
| SMARCD1    | -0.08877193  | 0 | 0.084 | 0.000123191 |
| KIAA1279   | -0.088421053 | 0 | 0.081 | 2.32E-08    |
| SLC25A16   | -0.088421053 | 0 | 0.081 | 4.23E-05    |
| TOR1B      | -0.087017544 | 0 | 0.082 | 0.000336538 |
| ULK2       | -0.086666667 | 0 | 0.082 | 1.56E-05    |
| ZNF320     | -0.086315789 | 0 | 0.079 | 8.60E-07    |
| EXOSC5     | -0.085964912 | 0 | 0.084 | 1.49E-06    |
| AC009948.5 | -0.084912281 | 0 | 0.076 | 5.15E-06    |
| FAM220A    | -0.084561404 | 0 | 0.079 | 3.81E-07    |
| NBPF14     | -0.083859649 | 0 | 0.076 | 9.05E-10    |
| LINC00094  | -0.083508772 | 0 | 0.079 | 9.84E-09    |
| CBFA2T3    | -0.083508772 | 0 | 0.07  | 4.74E-05    |
| TATDN2     | -0.083508772 | 0 | 0.079 | 0.001776324 |
| NOL9       | -0.083508772 | 0 | 0.076 | 0.004600646 |
| MLYCD      | -0.083157895 | 0 | 0.079 | 0.000105854 |
| RP11-85F14 | -0.082807018 | 0 | 0.076 | 9.15E-08    |
| METTL8     | -0.082807018 | 0 | 0.075 | 2.09E-05    |
| COG1       | -0.08245614  | 0 | 0.079 | 1.66E-06    |
| CYB561D1   | -0.08245614  | 0 | 0.078 | 0.000143834 |
| GEMIN2     | -0.082105263 | 0 | 0.078 | 1.23E-12    |
| PROSER1    | -0.082105263 | 0 | 0.079 | 0.000926486 |
| ZNF429     | -0.082105263 | 0 | 0.072 | 0.008898491 |
| VCPKMT     | -0.081754386 | 0 | 0.076 | 1.52E-09    |
| MTERF      | -0.081754386 | 0 | 0.077 | 2.55E-07    |
| C5orf56    | -0.081403509 | 0 | 0.078 | 1.58E-17    |
| DFNB31     | -0.081403509 | 0 | 0.075 | 1.14E-14    |
| MTG2       | -0.081403509 | 0 | 0.077 | 1.09E-08    |
| G6PC3      | -0.081403509 | 0 | 0.076 | 2.27E-08    |
| RP11-1094M | -0.081403509 | 0 | 0.076 | 0.000303811 |
| NUP155     | -0.081403509 | 0 | 0.077 | 0.000663776 |
| POLR3K     | -0.081052632 | 0 | 0.078 | 0.003094951 |
| ZNF496     | -0.080350877 | 0 | 0.076 | 0.0013032   |
| PIGL       | -0.08        | 0 | 0.074 | 3.03E-10    |
| TMEM129    | -0.08        | 0 | 0.076 | 2.22E-05    |
| HDAC7      | -0.079649123 | 0 | 0.072 | 7.70E-07    |
| HELZ2      | -0.079649123 | 0 | 0.074 | 0.006213012 |
| GSPT2      | -0.079298246 | 0 | 0.074 | 0.001864545 |
| GNL3L      | -0.078245614 | 0 | 0.071 | 0.001257434 |
| POLR3F     | -0.077894737 | 0 | 0.074 | 0.006036181 |
| SNORD3D    | -0.07754386  | 0 | 0.069 | 0.000571252 |
| CPSF4      | -0.07754386  | 0 | 0.072 | 0.001833458 |

|            |              |   |       |             |
|------------|--------------|---|-------|-------------|
| PIF1       | -0.076842105 | 0 | 0.061 | 6.38E-10    |
| ISOC1      | -0.076491228 | 0 | 0.074 | 2.57E-08    |
| CASP7      | -0.076491228 | 0 | 0.073 | 3.00E-06    |
| DPAGT1     | -0.076491228 | 0 | 0.072 | 0.00161628  |
| MAP7D3     | -0.076140351 | 0 | 0.067 | 1.88E-08    |
| FRMD4A     | -0.076140351 | 0 | 0.067 | 5.12E-08    |
| MYO19      | -0.076140351 | 0 | 0.071 | 7.14E-07    |
| GTF2IRD2B  | -0.076140351 | 0 | 0.069 | 1.23E-06    |
| COQ6       | -0.075789474 | 0 | 0.072 | 6.24E-06    |
| THEM4      | -0.075789474 | 0 | 0.068 | 4.39E-05    |
| LINC00926  | -0.075789474 | 0 | 0.064 | 0.000320774 |
| EXOC6      | -0.075789474 | 0 | 0.071 | 0.006994777 |
| NCBP1      | -0.075438596 | 0 | 0.073 | 0.008886815 |
| TSSC1      | -0.075087719 | 0 | 0.072 | 3.27E-11    |
| RINT1      | -0.075087719 | 0 | 0.072 | 3.35E-08    |
| MFSD2A     | -0.075087719 | 0 | 0.064 | 5.83E-05    |
| MANEA-AS1  | -0.074736842 | 0 | 0.07  | 2.28E-05    |
| TCEANC2    | -0.074736842 | 0 | 0.069 | 0.00138859  |
| AK9        | -0.074035088 | 0 | 0.068 | 6.19E-08    |
| TRIM26     | -0.073684211 | 0 | 0.072 | 1.39E-05    |
| RNF125     | -0.073684211 | 0 | 0.065 | 0.001107028 |
| NAPB       | -0.073333333 | 0 | 0.069 | 0.007720301 |
| ZNF775     | -0.072982456 | 0 | 0.069 | 0.000413335 |
| SIRT3      | -0.072631579 | 0 | 0.069 | 0.002594729 |
| GTPBP10    | -0.072280702 | 0 | 0.066 | 0.000116286 |
| COG8       | -0.071578947 | 0 | 0.068 | 4.24E-06    |
| PRKAB1     | -0.071578947 | 0 | 0.066 | 0.00030317  |
| HEATR3     | -0.071578947 | 0 | 0.064 | 0.003682213 |
| FECH       | -0.07122807  | 0 | 0.069 | 1.33E-06    |
| ALS2       | -0.07122807  | 0 | 0.065 | 0.000973006 |
| MINPP1     | -0.070877193 | 0 | 0.067 | 1.91E-05    |
| KIAA0101   | -0.070877193 | 0 | 0.019 | 0.000268998 |
| MIEF2      | -0.070526316 | 0 | 0.068 | 8.93E-05    |
| DIABLO     | -0.070175439 | 0 | 0.065 | 4.67E-15    |
| ZNF250     | -0.070175439 | 0 | 0.067 | 0.000210769 |
| TTL        | -0.070175439 | 0 | 0.062 | 0.000456708 |
| SLC46A3    | -0.070175439 | 0 | 0.061 | 0.004394626 |
| TPCN2      | -0.069824561 | 0 | 0.066 | 0.000155906 |
| LL22NC03-2 | -0.069473684 | 0 | 0.057 | 3.28E-08    |
| CLDN15     | -0.069473684 | 0 | 0.063 | 0.004716614 |
| IL10       | -0.06877193  | 0 | 0.061 | 9.82E-06    |
| ABHD17B    | -0.068421053 | 0 | 0.062 | 7.82E-05    |
| TMEM186    | -0.068421053 | 0 | 0.065 | 0.000787126 |
| PPCDC      | -0.068070175 | 0 | 0.066 | 0.001635842 |
| RIMKLB     | -0.066666667 | 0 | 0.056 | 1.52E-08    |
| DPH7       | -0.066666667 | 0 | 0.062 | 0.002152956 |
| SPHK2      | -0.065964912 | 0 | 0.062 | 1.44E-08    |
| CXorf56    | -0.065964912 | 0 | 0.064 | 2.03E-07    |
| RP5-1085F1 | -0.065614035 | 0 | 0.061 | 0.001722027 |
| C21orf91   | -0.065614035 | 0 | 0.057 | 0.001790348 |
| ATF7IP2    | -0.065263158 | 0 | 0.058 | 7.71E-08    |
| TBL3       | -0.065263158 | 0 | 0.062 | 3.34E-05    |

|             |              |   |       |             |
|-------------|--------------|---|-------|-------------|
| RAB24       | -0.064912281 | 0 | 0.062 | 9.26E-09    |
| ZNF600      | -0.064561404 | 0 | 0.061 | 9.30E-08    |
| RP4-635E18  | -0.064561404 | 0 | 0.061 | 8.87E-07    |
| SDS         | -0.064561404 | 0 | 0.039 | 7.03E-05    |
| HOXB2       | -0.064210526 | 0 | 0.059 | 3.37E-20    |
| AMN1        | -0.064210526 | 0 | 0.061 | 1.39E-06    |
| LPIN1       | -0.064210526 | 0 | 0.058 | 4.93E-05    |
| TPD52       | -0.064210526 | 0 | 0.057 | 0.000138844 |
| C7orf31     | -0.064210526 | 0 | 0.061 | 0.005496808 |
| TMCO6       | -0.063859649 | 0 | 0.06  | 1.14E-06    |
| NIPAL3      | -0.063859649 | 0 | 0.058 | 3.10E-05    |
| OGFOD1      | -0.063859649 | 0 | 0.058 | 0.000124999 |
| C12orf49    | -0.063508772 | 0 | 0.06  | 2.85E-09    |
| RP5-899E9.1 | -0.063508772 | 0 | 0.061 | 5.64E-09    |
| ELP4        | -0.063508772 | 0 | 0.06  | 0.009016975 |
| ODF2        | -0.063157895 | 0 | 0.059 | 1.46E-06    |
| RP11-443B7  | -0.06245614  | 0 | 0.058 | 3.74E-06    |
| IGSF9       | -0.06245614  | 0 | 0.059 | 0.008649509 |
| LACE1       | -0.062105263 | 0 | 0.059 | 2.21E-05    |
| JMJD8       | -0.061754386 | 0 | 0.058 | 0.000261492 |
| PSME3       | -0.061754386 | 0 | 0.055 | 0.000407942 |
| TIMM8A      | -0.061403509 | 0 | 0.059 | 8.56E-08    |
| UBOX5       | -0.061403509 | 0 | 0.058 | 0.003053975 |
| RP11-215P8  | -0.061052632 | 0 | 0.055 | 0.000264167 |
| INO80C      | -0.060701754 | 0 | 0.058 | 3.09E-08    |
| DAGLA       | -0.060350877 | 0 | 0.055 | 0.000942604 |
| COX10       | -0.059649123 | 0 | 0.056 | 5.90E-11    |
| MKS1        | -0.059649123 | 0 | 0.058 | 0.001805012 |
| MAD2L1      | -0.059298246 | 0 | 0.045 | 6.04E-07    |
| PRR11       | -0.058947368 | 0 | 0.05  | 0.000490897 |
| TBC1D32     | -0.058947368 | 0 | 0.054 | 0.000887656 |
| CHST13      | -0.058947368 | 0 | 0.054 | 0.001208123 |
| RAD52       | -0.058596491 | 0 | 0.056 | 0.002855925 |
| ABCC5       | -0.058245614 | 0 | 0.053 | 0.000411416 |
| CTC-425F1.4 | -0.057894737 | 0 | 0.052 | 3.63E-14    |
| APOL1       | -0.05754386  | 0 | 0.055 | 1.85E-13    |
| ZNF574      | -0.05754386  | 0 | 0.055 | 0.000300933 |
| ARL 10.00   | -0.057192982 | 0 | 0.051 | 1.64E-05    |
| KAT2A       | -0.056491228 | 0 | 0.052 | 0.000232396 |
| SYNC        | -0.056140351 | 0 | 0.052 | 3.57E-19    |
| RP11-356N1  | -0.056140351 | 0 | 0.054 | 3.23E-07    |
| SURF2       | -0.055789474 | 0 | 0.053 | 3.15E-05    |
| PIGQ        | -0.054736842 | 0 | 0.052 | 0.002025013 |
| FEM1A       | -0.054385965 | 0 | 0.052 | 0.000558665 |
| ATP13A2     | -0.054385965 | 0 | 0.05  | 0.008339364 |
| FLAD1       | -0.054035088 | 0 | 0.051 | 0.000208048 |
| LGALS3BP    | -0.054035088 | 0 | 0.046 | 0.000584886 |
| LCAT        | -0.054035088 | 0 | 0.053 | 0.008607404 |
| GPSM2       | -0.053684211 | 0 | 0.047 | 0.000178549 |
| KIAA0040    | -0.053684211 | 0 | 0.049 | 0.002340056 |
| DLEU1       | -0.052982456 | 0 | 0.049 | 1.73E-06    |
| AHDC1       | -0.052631579 | 0 | 0.051 | 0.002223994 |

|             |              |   |       |             |
|-------------|--------------|---|-------|-------------|
| CARD14      | -0.052280702 | 0 | 0.049 | 0.000712616 |
| PAXIP1-AS2  | -0.052280702 | 0 | 0.051 | 0.003027831 |
| C4orf46     | -0.051929825 | 0 | 0.051 | 3.51E-09    |
| RP11-752G1  | -0.051929825 | 0 | 0.051 | 0.004223122 |
| ARHGAP11E   | -0.051578947 | 0 | 0.045 | 0.002392638 |
| PROC        | -0.05122807  | 0 | 0.043 | 6.64E-11    |
| PTPDC1      | -0.05122807  | 0 | 0.048 | 0.000267603 |
| ALKBH2      | -0.05122807  | 0 | 0.05  | 0.00308037  |
| IQSEC2      | -0.050877193 | 0 | 0.049 | 1.67E-05    |
| RP11-708J1  | -0.050877193 | 0 | 0.046 | 0.000621458 |
| RP11-294J2  | -0.050175439 | 0 | 0.046 | 7.69E-14    |
| EPS8        | -0.050175439 | 0 | 0.047 | 1.49E-13    |
| ABCB8       | -0.050175439 | 0 | 0.048 | 0.002516002 |
| CD22        | -0.049473684 | 0 | 0.048 | 7.88E-06    |
| UCHL1       | -0.049473684 | 0 | 0.042 | 0.00075792  |
| TTI2        | -0.049473684 | 0 | 0.048 | 0.00273672  |
| AARSD1      | -0.049122807 | 0 | 0.045 | 9.77E-09    |
| TUBE1       | -0.048070175 | 0 | 0.045 | 2.16E-05    |
| C18orf54    | -0.048070175 | 0 | 0.044 | 0.005775376 |
| KLHL18      | -0.047719298 | 0 | 0.045 | 0.000670473 |
| ZNF703      | -0.047719298 | 0 | 0.043 | 0.000942303 |
| RP11-395A1  | -0.047368421 | 0 | 0.044 | 0.00363182  |
| TARBP1      | -0.045614035 | 0 | 0.042 | 0.000224021 |
| RP11-81A22  | -0.045263158 | 0 | 0.044 | 4.68E-08    |
| CCDC142     | -0.045263158 | 0 | 0.041 | 0.000287546 |
| C21orf119   | -0.045263158 | 0 | 0.043 | 0.000593963 |
| BCAR3       | -0.044561404 | 0 | 0.043 | 0.000365332 |
| TIE1        | -0.043859649 | 0 | 0.033 | 4.23E-11    |
| SHOX2       | -0.043859649 | 0 | 0.036 | 0.006876383 |
| RP5-1065J2  | -0.043508772 | 0 | 0.036 | 0.007773117 |
| TMEM255B    | -0.043157895 | 0 | 0.042 | 3.50E-08    |
| TVP23C      | -0.043157895 | 0 | 0.04  | 9.44E-06    |
| TMCO4       | -0.042807018 | 0 | 0.04  | 0.00990121  |
| LY9         | -0.04245614  | 0 | 0.037 | 6.02E-06    |
| MMAA        | -0.04245614  | 0 | 0.041 | 0.001725731 |
| GATSL3      | -0.042105263 | 0 | 0.04  | 4.81E-07    |
| CTAGE5      | -0.041052632 | 0 | 0.041 | 0.004128152 |
| SNRPN       | -0.039298246 | 0 | 0.037 | 5.96E-06    |
| AC016831.7  | -0.038245614 | 0 | 0.036 | 4.94E-14    |
| RP3-473L9.4 | -0.038245614 | 0 | 0.036 | 4.39E-10    |
| SCRG1       | -0.038245614 | 0 | 0.034 | 0.003990626 |
| LINC00115   | -0.037894737 | 0 | 0.032 | 1.29E-05    |
| NOP16       | -0.037894737 | 0 | 0.037 | 1.32E-05    |
| C5orf28     | -0.037894737 | 0 | 0.037 | 3.43E-05    |
| ALDH1A2     | -0.037894737 | 0 | 0.032 | 9.46E-05    |
| ARHGEF12    | -0.037894737 | 0 | 0.036 | 0.009558303 |
| CTC-246B18  | -0.03754386  | 0 | 0.034 | 5.25E-11    |
| ZNF584      | -0.036842105 | 0 | 0.035 | 2.48E-05    |
| ORC6        | -0.036842105 | 0 | 0.033 | 0.006553567 |
| ZFP82       | -0.036491228 | 0 | 0.035 | 3.67E-05    |
| PXN-AS1     | -0.036491228 | 0 | 0.036 | 0.009307412 |
| HDAC9       | -0.035087719 | 0 | 0.033 | 1.58E-06    |

|            |               |   |       |             |
|------------|---------------|---|-------|-------------|
| NIPAL2     | -0.035087719  | 0 | 0.033 | 0.002978029 |
| RP11-192H2 | -0.0333333333 | 0 | 0.032 | 1.37E-08    |
| AP000769.1 | -0.032982456  | 0 | 0.032 | 9.38E-05    |
| DPP4       | -0.032982456  | 0 | 0.025 | 0.007812396 |
| USP6       | -0.032280702  | 0 | 0.032 | 0.003995942 |
| ZNF84      | -0.031578947  | 0 | 0.031 | 1.41E-10    |
| EIF5AL1    | -0.031578947  | 0 | 0.031 | 1.51E-07    |
| SLC5A6     | -0.030526316  | 0 | 0.03  | 0.007696142 |
| NPIP15     | -0.029122807  | 0 | 0.028 | 0.006165393 |
| BMPR1A     | -0.027719298  | 0 | 0.027 | 0.001389311 |

**Footnotes:**

- 1- Value refers to average differential expression within one subset of scaled pearsons residuals. Positive values represent increased gene expression in HIV+ cells without ART. Negative values represent increased gene expression in HIV+ cells with ART
- 2- Percentage of cells, within the cluster ID for which the gene is a marker, that detect the gene
- 3- Percentage of all the other cells, excluding the cluster ID for which the gene is a marker, that detect the gene
