# Supplementary material for: Interactions of Monocytes, HIV, and ART Identified by an Innovative scRNAseq Pipeline: Pathways to Reservoirs and HIV-Associated Comorbidities
Source: PubMed Central journal article supplement (PMC7387797; doi:10.1128/mbio.01037-20), 2020-07-28
Supplement: mBio.01037-20-st005.pdf [file mBio.01037-20-st005.pdf]

**Supplementary Table 5:** List of differentially expressed genes between cluster 8 and all other monocyte clusters from the integrated dataset of HIV-infected mature monocytes with and without ART-treatment (Cluster 8 vs all other clusters).

| Gene.ID   | Avg. Diff. <sup>1</sup> | Pct.1 <sup>2</sup> | Pct.2 <sup>3</sup> | P.Value.Adj           |
|-----------|-------------------------|--------------------|--------------------|-----------------------|
| FTL       | 1054.17391499605        | 1                  | 1                  | 3.32879859429307E-121 |
| SPP1      | 155.8135398             | 1                  | 0.993              | 7.54149861834965E-34  |
| MT-CO1    | 47.0183666              | 1                  | 0.994              | 0.000164255           |
| TMSB4X    | 44.3558083              | 1                  | 0.999              | 7.58881345345325E-14  |
| CSTB      | 25.20515703             | 1                  | 1                  | 1.6247044821077E-22   |
| MT-CO3    | 17.69510556             | 1                  | 0.974              | 1.90163685256304E-08  |
| S100A11   | 16.28156743             | 1                  | 0.996              | 5.91862108825992E-14  |
| VIM       | 14.93026188             | 1                  | 1                  | 0.00416233            |
| MT-ATP6   | 14.38791994             | 1                  | 0.956              | 1.67995375661364E-25  |
| ACTB      | 13.51531278             | 1                  | 0.974              | 0.006327628           |
| LGALS3    | 12.68822181             | 0.998              | 0.98               | 1.42369138538532E-07  |
| FABP5     | 9.745828353             | 0.998              | 0.684              | 3.55004705777801E-17  |
| SH3BGRL3  | 9.65976577              | 1                  | 0.977              | 1.07122484427575E-12  |
| MT-ND1    | 7.946783528             | 1                  | 0.939              | 4.58496842732316E-33  |
| OAZ1      | 7.550074876             | 1                  | 0.994              | 1.73750431905935E-09  |
| CTSD      | 7.321855791             | 1                  | 0.993              | 0.000149909           |
| MT-ND5    | 5.568202231             | 1                  | 0.882              | 5.20175668050359E-14  |
| MYL6      | 5.547623655             | 1                  | 0.981              | 8.22933869780367E-13  |
| HLA-B     | 4.819649938             | 1                  | 0.997              | 1.18553357068471E-32  |
| MT-ND3    | 4.393184513             | 1                  | 0.923              | 2.61906283888829E-87  |
| YBX1      | 4.01770521              | 1                  | 0.984              | 3.56672971556661E-07  |
| ARPC1B    | 3.691988869             | 1                  | 0.715              | 7.1750707093598E-05   |
| MT-ND2    | 3.65257174              | 1                  | 0.952              | 2.86235030814425E-46  |
| GRN       | 2.828861203             | 0.996              | 0.917              | 7.45855068564417E-08  |
| HLA-C     | 2.572052983             | 1                  | 0.962              | 8.59568400230214E-12  |
| PLD3      | 2.223104754             | 1                  | 0.913              | 7.38272643842793E-16  |
| MTRNR2L12 | 2.122970517             | 1                  | 0.787              | 1.60955412462066E-11  |
| PSAP      | 1.621749806             | 1                  | 0.982              | 4.48860149254226E-36  |
| HLA-A     | 1.529599999             | 1                  | 0.997              | 6.06137955992518E-67  |
| SRGN      | 1.52076597              | 1                  | 0.984              | 3.42179409557055E-12  |
| RPS29     | 1.51885325              | 0.998              | 0.995              | 1.80193137092758E-19  |
| GPNMB     | 1.444073468             | 0.996              | 0.981              | 3.21723006629231E-21  |
| FABP4     | 1.186870864             | 0.295              | 0.206              | 3.94602080394931E-08  |
| LIPA      | 1.136328526             | 0.996              | 0.646              | 1.54781552270101E-07  |
| LGALS2    | 1.120550733             | 0.97               | 0.345              | 1.14545285301388E-05  |
| NPC2      | 1.017722765             | 1                  | 0.999              | 6.75693527602974E-05  |
| MT-ND4L   | 0.903087378             | 0.975              | 0.604              | 1.68640603054349E-29  |
| LDHA      | 0.77860465              | 1                  | 0.986              | 0.000283825           |
| PTPRE     | 0.736058173             | 0.97               | 0.733              | 0.005878114           |
| C5AR1     | 0.671297204             | 0.96               | 0.595              | 1.06817847089939E-05  |
| FUCA1     | 0.665517402             | 0.966              | 0.542              | 1.19406022666453E-30  |
| HEXA      | 0.631087225             | 0.975              | 0.704              | 2.72610458190641E-07  |
| TMEM176B  | 0.599315667             | 0.956              | 0.509              | 4.75518392395881E-19  |
| CSF1R     | 0.591343484             | 0.962              | 0.595              | 4.02052671695708E-10  |
| LRP1      | 0.542856758             | 0.979              | 0.848              | 3.23999252748414E-21  |
| GNS       | 0.53703368              | 0.989              | 0.709              | 0.003393322           |
| GAA       | 0.536442921             | 0.973              | 0.686              | 4.15936711621081E-07  |

|          |             |       |       |                      |
|----------|-------------|-------|-------|----------------------|
| LRPAP1   | 0.533293977 | 0.977 | 0.78  | 8.02323942783449E-07 |
| RNASE6   | 0.527955917 | 0.966 | 0.66  | 8.99178882839105E-13 |
| STAB1    | 0.487117211 | 0.932 | 0.306 | 1.98826327262556E-12 |
| SLC16A3  | 0.48039146  | 0.979 | 0.767 | 3.03415674838143E-11 |
| GPRIN3   | 0.468842064 | 0.858 | 0.342 | 0.00198956           |
| PARP14   | 0.466343076 | 0.898 | 0.354 | 1.56133775181987E-08 |
| ZRANB2   | 0.458353747 | 0.824 | 0.319 | 7.40357275669691E-06 |
| HIST1H4C | 0.456562282 | 0.947 | 0.389 | 0.000518368          |
| CD36     | 0.455246445 | 0.966 | 0.557 | 0.008951412          |
| RNF213   | 0.434733599 | 0.932 | 0.387 | 1.57214350293356E-13 |
| CD74     | 0.43263267  | 0.994 | 0.796 | 1.73116147728195E-38 |
| IL17RA   | 0.410023794 | 0.943 | 0.459 | 0.000896745          |
| NABP1    | 0.409537959 | 0.938 | 0.44  | 1.42926020468449E-05 |
| A2M      | 0.408435236 | 0.953 | 0.381 | 1.97638776286996E-05 |
| TTYH3    | 0.402933463 | 0.816 | 0.34  | 4.81033746495088E-08 |
| GTF2I    | 0.402905292 | 0.907 | 0.401 | 9.37053801499188E-08 |
| NCF4     | 0.395955813 | 0.869 | 0.387 | 0.000105445          |
| MGAT1    | 0.395878242 | 0.983 | 0.906 | 1.97899334698364E-07 |
| PRPF4B   | 0.391700471 | 0.867 | 0.392 | 3.10180024243503E-06 |
| KLF13    | 0.389564839 | 0.867 | 0.388 | 1.46801572920205E-06 |
| C1QA     | 0.380515246 | 0.911 | 0.242 | 6.30179558176944E-12 |
| GATAD1   | 0.379988585 | 0.892 | 0.401 | 3.4189110844844E-07  |
| HEXB     | 0.374686453 | 0.981 | 0.682 | 6.29910287794977E-07 |
| VMP1     | 0.373231398 | 0.972 | 0.715 | 1.77378207565499E-23 |
| PARP4    | 0.373221599 | 0.818 | 0.388 | 0.007877213          |
| MAF      | 0.358638389 | 0.919 | 0.371 | 6.41493518441802E-17 |
| MACF1    | 0.358615526 | 0.934 | 0.433 | 1.32424185474819E-11 |
| CCR1     | 0.352907579 | 0.928 | 0.436 | 3.60181565056967E-06 |
| HLA-DMB  | 0.352405822 | 0.737 | 0.26  | 6.50773228855282E-14 |
| SCPEP1   | 0.35202736  | 0.949 | 0.413 | 1.45036201073689E-06 |
| CTSC     | 0.349943578 | 0.92  | 0.375 | 5.40521735195953E-18 |
| ARL4C    | 0.347230251 | 0.949 | 0.494 | 3.32962740603222E-67 |
| LPAR6    | 0.339666742 | 0.854 | 0.347 | 1.04446717320654E-12 |
| IER5L    | 0.337492733 | 0.938 | 0.457 | 0.000954822          |
| ADAMDEC1 | 0.332653165 | 0.953 | 0.57  | 4.10856584874454E-31 |
| ARGLU1   | 0.325189271 | 0.943 | 0.463 | 4.46317467600364E-13 |
| PLEC     | 0.316110284 | 0.746 | 0.363 | 0.0030766            |
| PTAFR    | 0.314945097 | 0.926 | 0.419 | 2.23617795259232E-21 |
| SEMA6B   | 0.31261064  | 0.741 | 0.333 | 3.86860307520903E-09 |
| MIR142   | 0.311372373 | 0.867 | 0.381 | 3.92981772131714E-15 |
| TKT      | 0.311068624 | 0.998 | 0.935 | 0.001455167          |
| IL10RA   | 0.308292017 | 0.93  | 0.493 | 0.000591304          |
| GOLGB1   | 0.307330962 | 0.936 | 0.444 | 6.35762032620875E-12 |
| CFDP1    | 0.305252079 | 0.841 | 0.427 | 1.0567630393735E-05  |
| CD4      | 0.302377896 | 0.943 | 0.474 | 0.000315759          |
| FYB      | 0.297275814 | 0.958 | 0.541 | 1.67795818606299E-11 |
| PRPF38B  | 0.295786056 | 0.909 | 0.462 | 9.74575693442563E-10 |
| AMICA1   | 0.295079759 | 0.824 | 0.369 | 8.82646429984342E-15 |
| TMEM176A | 0.293289927 | 0.936 | 0.399 | 2.21805648871912E-10 |
| UBC      | 0.288414023 | 0.985 | 0.992 | 0.005253786          |
| CLMN     | 0.287440312 | 0.888 | 0.438 | 1.66594670122937E-07 |
| ZKSCAN1  | 0.281547421 | 0.919 | 0.436 | 3.07474309868279E-16 |

|           |             |       |       |                      |
|-----------|-------------|-------|-------|----------------------|
| KDM2A     | 0.281082816 | 0.831 | 0.422 | 3.16688658572818E-10 |
| APPL1     | 0.274499549 | 0.886 | 0.445 | 4.02186761259552E-09 |
| SLC2A1    | 0.273604633 | 0.883 | 0.375 | 7.3644187328067E-10  |
| PCM1      | 0.273575647 | 0.932 | 0.499 | 0.000279325          |
| CSF2RA    | 0.272499053 | 0.884 | 0.43  | 4.59572505653289E-10 |
| DOCK8     | 0.270499373 | 0.792 | 0.41  | 9.41399145584061E-05 |
| FAM118A   | 0.268314749 | 0.547 | 0.229 | 3.55227882974779E-14 |
| STK4      | 0.265725943 | 0.934 | 0.483 | 1.18918534594064E-19 |
| GGA1      | 0.265403006 | 0.822 | 0.424 | 2.49105749746767E-10 |
| TNFSF13B  | 0.259368447 | 0.956 | 0.448 | 4.48151908443732E-18 |
| RSF1      | 0.257190764 | 0.784 | 0.422 | 0.005330079          |
| ABCC3     | 0.256723709 | 0.949 | 0.496 | 1.90219694357572E-13 |
| KMT2C     | 0.25576837  | 0.888 | 0.467 | 6.18979542999042E-05 |
| LINC00969 | 0.251325635 | 0.941 | 0.525 | 7.78061626939619E-13 |
| ASH1L     | 0.249811382 | 0.83  | 0.426 | 1.26948812390067E-09 |
| PTTG1IP   | 0.244148752 | 0.928 | 0.468 | 1.30919935887312E-08 |
| S100A9    | 0.242538965 | 0.964 | 0.434 | 8.40604808772897E-10 |
| ST8SIA4   | 0.241417054 | 0.797 | 0.355 | 1.88914329348381E-28 |
| RAPGEF1   | 0.238688622 | 0.972 | 0.672 | 8.29750198146595E-07 |
| AKAP9     | 0.238551853 | 0.934 | 0.486 | 7.07994003488425E-14 |
| DDX17     | 0.235168973 | 0.981 | 0.8   | 1.08736498188417E-08 |
| PTPRC     | 0.233181541 | 0.981 | 0.769 | 1.65859937847614E-14 |
| DDX24     | 0.230525371 | 0.951 | 0.51  | 6.60508429885301E-12 |
| CLN8      | 0.223565685 | 0.939 | 0.508 | 5.59784654422762E-11 |
| BOD1L1    | 0.223180283 | 0.941 | 0.507 | 1.17351238053135E-10 |
| U2AF1     | 0.222754463 | 0.932 | 0.548 | 0.002766444          |
| ICAM3     | 0.217414362 | 0.913 | 0.395 | 1.70099619243315E-30 |
| ZBTB1     | 0.215373448 | 0.917 | 0.505 | 0.005568854          |
| AHR       | 0.214609585 | 0.928 | 0.502 | 0.000425711          |
| RAP2B     | 0.211398176 | 0.949 | 0.511 | 1.5297270343445E-08  |
| GK        | 0.211246301 | 0.826 | 0.431 | 2.76489328856447E-06 |
| CEP350    | 0.209133124 | 0.78  | 0.4   | 9.84697388432814E-24 |
| TAOK1     | 0.206308749 | 0.665 | 0.38  | 0.001619282          |
| HLA-DRB1  | 0.20471121  | 0.968 | 0.559 | 5.64811266943332E-38 |
| PRRC2C    | 0.204267835 | 0.972 | 0.748 | 6.80944879774168E-15 |
| CELF2     | 0.204152704 | 0.926 | 0.474 | 1.80701613042226E-12 |
| CD86      | 0.199896954 | 0.958 | 0.556 | 0.002432873          |
| YIPF4     | 0.199712418 | 0.86  | 0.441 | 6.12040849742009E-30 |
| NOTCH2    | 0.198476193 | 0.92  | 0.528 | 0.000211018          |
| TNRC6B    | 0.194938989 | 0.93  | 0.489 | 3.8895002570734E-16  |
| TFPI      | 0.194605845 | 0.83  | 0.435 | 1.33201110044366E-11 |
| TNFAIP2   | 0.194394364 | 0.951 | 0.509 | 1.70493437069423E-10 |
| ATRX      | 0.19180515  | 0.938 | 0.506 | 1.56229004040696E-11 |
| SLC43A2   | 0.190976781 | 0.926 | 0.442 | 4.58339078891382E-29 |
| NPEPPS    | 0.189842214 | 0.915 | 0.509 | 3.48822419799889E-05 |
| HLA-DMA   | 0.18823406  | 0.955 | 0.571 | 0.000426317          |
| FAM133B   | 0.185360694 | 0.884 | 0.492 | 3.73570621995626E-05 |
| STAT3     | 0.184965085 | 0.915 | 0.499 | 7.608433370303E-19   |
| PDCD4     | 0.182199093 | 0.805 | 0.438 | 4.81441731815222E-18 |
| RSRC2     | 0.179456371 | 0.936 | 0.552 | 6.30376083968023E-05 |
| CSF3R     | 0.179015854 | 0.943 | 0.495 | 3.17697957531472E-20 |
| TMEM59    | 0.178614121 | 0.985 | 0.834 | 0.000553946          |

|          |             |       |       |                      |
|----------|-------------|-------|-------|----------------------|
| DICER1   | 0.175255737 | 0.947 | 0.55  | 4.85018535838969E-10 |
| TMF1     | 0.174178327 | 0.928 | 0.525 | 0.000668399          |
| FMNL1    | 0.17180141  | 0.947 | 0.566 | 0.000182739          |
| HP1BP3   | 0.171022033 | 0.947 | 0.571 | 1.82163245031812E-05 |
| PTBP3    | 0.170897513 | 0.924 | 0.502 | 2.76617530192694E-13 |
| HIPK2    | 0.16907951  | 0.938 | 0.525 | 0.0014452            |
| ZFYVE16  | 0.167401543 | 0.939 | 0.531 | 9.00609746385709E-07 |
| ARID4A   | 0.167340711 | 0.79  | 0.438 | 1.97643906056853E-12 |
| LGALS8   | 0.166784655 | 0.693 | 0.418 | 0.000816018          |
| MPHOSPH8 | 0.166235131 | 0.953 | 0.556 | 1.18442835288718E-38 |
| RBM25    | 0.166096729 | 0.934 | 0.547 | 3.98062427887326E-09 |
| HLA-DPB1 | 0.16497686  | 0.953 | 0.406 | 6.84087553468423E-17 |
| ARID4B   | 0.164652289 | 0.922 | 0.528 | 1.54109873005628E-08 |
| SAMSN1   | 0.164563288 | 0.693 | 0.38  | 0.000322961          |
| PNN      | 0.164004782 | 0.93  | 0.507 | 2.76300182562627E-24 |
| IL6R     | 0.162830204 | 0.652 | 0.363 | 2.98788200003216E-08 |
| FOXO3    | 0.162116558 | 0.928 | 0.508 | 5.1537675717335E-08  |
| SPEN     | 0.161801786 | 0.718 | 0.416 | 6.50355500396547E-05 |
| STX7     | 0.161396379 | 0.939 | 0.555 | 1.66577757281051E-06 |
| LRRFIP1  | 0.160396947 | 0.985 | 0.899 | 0.000892454          |
| TMEM30A  | 0.159735151 | 0.903 | 0.506 | 0.000437964          |
| PRKAG2   | 0.157732613 | 0.949 | 0.556 | 3.50026038341807E-06 |
| CFLAR    | 0.156247346 | 0.968 | 0.745 | 2.0267670452501E-24  |
| PHF21A   | 0.154463638 | 0.826 | 0.441 | 1.32196503109716E-21 |
| YME1L1   | 0.143814465 | 0.913 | 0.526 | 4.38756713529195E-05 |
| KMT2A    | 0.142000137 | 0.913 | 0.476 | 1.60471498531102E-35 |
| MIDN     | 0.141765385 | 0.932 | 0.488 | 5.42049803657098E-08 |
| SMCHD1   | 0.141694347 | 0.913 | 0.515 | 8.47511851615405E-10 |
| RAD21    | 0.140943548 | 0.742 | 0.449 | 0.000324756          |
| MIS18BP1 | 0.139997191 | 0.936 | 0.517 | 1.70313318770787E-10 |
| NUFIP2   | 0.139959631 | 0.915 | 0.509 | 6.98042951355504E-11 |
| GPATCH2L | 0.138754842 | 0.938 | 0.525 | 7.21641535719392E-13 |
| TRIM38   | 0.135000849 | 0.93  | 0.492 | 5.22491304303349E-34 |
| TET2     | 0.133584171 | 0.733 | 0.436 | 0.000416699          |
| TNFRSF1B | 0.133557634 | 0.981 | 0.892 | 2.15230911810384E-18 |
| LAPTM5   | 0.132752128 | 1     | 0.984 | 2.87838402661212E-09 |
| ZCCHC6   | 0.131857212 | 0.928 | 0.521 | 2.71344491986554E-06 |
| MDM4     | 0.126027194 | 0.938 | 0.54  | 8.60824567462401E-13 |
| PABPN1   | 0.121358688 | 0.598 | 0.394 | 1.58264436950671E-05 |
| WAC      | 0.118848678 | 0.907 | 0.53  | 2.44443002067687E-07 |
| FPR3     | 0.117491606 | 0.491 | 0.311 | 0.00078591           |
| CPVL     | 0.117458537 | 0.943 | 0.473 | 4.32843856868763E-24 |
| GOLGA4   | 0.114423089 | 0.938 | 0.524 | 2.22813457335312E-14 |
| ANKRD11  | 0.114315308 | 0.949 | 0.539 | 5.56075514313143E-20 |
| LUCAT1   | 0.107018803 | 0.92  | 0.462 | 1.63637441612681E-38 |
| LUC7L3   | 0.106959605 | 0.943 | 0.562 | 4.8291208154142E-17  |
| CDA      | 0.106163489 | 0.956 | 0.544 | 4.31355118103148E-06 |
| AKAP10   | 0.103548962 | 0.782 | 0.452 | 3.31704923434851E-14 |
| ZNF638   | 0.094937846 | 0.922 | 0.53  | 1.05244490227531E-15 |
| RREB1    | 0.092338833 | 0.58  | 0.383 | 4.58516117551453E-08 |
| ZNF148   | 0.091319397 | 0.653 | 0.405 | 7.26441578043951E-11 |
| TGFBI    | 0.090426114 | 0.972 | 0.586 | 1.00146329794524E-42 |

|          |             |       |       |                      |
|----------|-------------|-------|-------|----------------------|
| C9orf72  | 0.088010821 | 0.812 | 0.476 | 1.65986705190674E-05 |
| RNF145   | 0.083496639 | 0.809 | 0.485 | 4.59057424792545E-15 |
| CASP4    | 0.080085589 | 0.672 | 0.441 | 0.00346468           |
| ANPEP    | 0.080023941 | 0.966 | 0.614 | 2.90020132413017E-08 |
| ATF5     | 0.077409006 | 0.943 | 0.469 | 0.000120956          |
| CD82     | 0.075797586 | 0.424 | 0.306 | 4.5335807739816E-06  |
| ZMYM2    | 0.074472767 | 0.909 | 0.53  | 4.67037351241834E-22 |
| FAM63B   | 0.074166569 | 0.919 | 0.527 | 8.42884203791691E-10 |
| ATXN1    | 0.066874555 | 0.932 | 0.537 | 1.17531468532399E-09 |
| SBF2     | 0.064978166 | 0.75  | 0.476 | 2.48589166216781E-08 |
| TBL1XR1  | 0.061759408 | 0.616 | 0.404 | 1.76297107988896E-17 |
| HNRNPUL1 | 0.059429034 | 0.561 | 0.405 | 0.00259343           |
| CECR1    | 0.058494924 | 0.955 | 0.546 | 5.57758785944169E-12 |
| CYP1B1   | 0.051124116 | 0.979 | 0.63  | 1.24673672222861E-27 |
| PKN2     | 0.050579899 | 0.549 | 0.378 | 1.11185581694952E-07 |
| ATM      | 0.04951637  | 0.951 | 0.581 | 8.57846401448518E-14 |
| CHURC1   | 0.045906494 | 0.634 | 0.441 | 4.34899111353652E-05 |
| NKTR     | 0.044326919 | 0.939 | 0.523 | 6.16737297226646E-35 |
| JAK1     | 0.041898561 | 0.958 | 0.618 | 0.001726945          |
| JARID2   | 0.039965428 | 0.938 | 0.543 | 5.73676161854901E-11 |
| IDS      | 0.034568987 | 0.958 | 0.607 | 0.00060246           |
| SFPQ     | 0.033815739 | 0.917 | 0.547 | 4.32943766473498E-06 |
| IVNS1ABP | 0.033627529 | 0.699 | 0.456 | 4.45076824490831E-09 |
| LPP      | 0.031978956 | 0.938 | 0.533 | 1.24236667148703E-15 |
| PHF3     | 0.028502583 | 0.956 | 0.586 | 1.51802368353559E-06 |

**Footnotes:**

- 1- Value refers to average differential expression within one subset of scaled pearsons residuals.
- 2- Percentage of cells, within the cluster ID for which the gene is a marker, that detect the gene
- 3- Percentage of all the other cells, excluding the cluster ID for which the gene is a marker, that detect the gene
